# Supplementary material for: Grassland Arthropods Are Controlled by Direct and Indirect Interactions with Cattle but Are Largely Unaffected by Plant Provenance
Source: PLoS One. 2015 Jul 9;10(7):e0129823. doi: 10.1371/journal.pone.0129823 (PMC4497643; doi:10.1371/journal.pone.0129823)
Supplement: S1 Dataset — File is a workbook with four spreadsheets: “ArthropodCounts” contains the raw arthropod data collected in this experiment; “ArthropodMetadata” describes that spreadsheet; “PlantData” contains the plant community metrics from each experimental plot used in this analysis; and “PlantExplanation” clarifies the plant data measurements. (XLSX) [file pone.0129823.s001.xlsx]

## Sheet: ArthropodCounts
Experiment	Field	Plot	Grass	Graze	Subplot	Replicate	ID	count	Pinned	Length 1	Width 1	Length 2	Width 2	Length 3	Width 3	Length 4	Width 4	Length 5	Width 5	Length 6	Width 6	Length 7	Width 7	Length 8	Width 8	Length 9	Width 9	Notes
Stan	14	2	A	U	12	A	1	61
Stan	14	2	A	U	12	B	1	122
Stan	5	3	A	U	12	B	1	459
Stan	5	6	A	U	12	A	1	215
Stan	5	6	A	U	12	B	1	154
Stan	14	7	A	U	12	B	1	11
Stan	14	7	A	U	12	A	1	23
Stan	14	7	A	U	12	B	10	2		3.8	1.8	1.8
Stan	14	2	A	U	12	A	10	1		6.5	2.2
Stan	5	3	A	U	12	B	10	1		9.4	3.5
Stan	14	2	A	U	12	A	30	2		1	0.2
Stan	14	2	A	U	12	B	30	2
Stan	5	3	A	U	12	B	30	1
Stan	5	6	A	U	12	B	30	2
Stan	14	7	A	U	12	B	30	22
Stan	14	7	A	U	12	A	30	23
Stan	14	2	A	U	12	A	31	1		1.2	0.3
Stan	14	2	A	U	12	B	31	7
Stan	5	3	A	U	12	B	31	17
Stan	5	3	A	U	12	B	31	7
Stan	5	6	A	U	12	A	31	19
Stan	5	6	A	U	12	B	31	23
Stan	14	7	A	U	12	B	31	20
Stan	14	7	A	U	12	A	31	4
Stan	14	2	A	U	12	A	32	4
Stan	14	2	A	U	12	B	32	2
Stan	5	3	A	U	12	B	32	3
Stan	5	6	A	U	12	A	32	1
Stan	5	6	A	U	12	A	32	11
Stan	5	6	A	U	12	B	32	12
Stan	14	7	A	U	12	B	32	21
Stan	14	7	A	U	12	A	32	27
Stan	5	3	A	U	12	B	33	3
Stan	5	6	A	U	12	A	33	2		0.8	0.2
Stan	14	7	A	U	12	A	33	2
Stan	14	7	A	U	12	B	100	1	139774	2.7	1
Stan	14	7	A	U	12	A	100	2		2.2	0.9
Stan	5	6	A	U	12	A	101	1		1.5	0.6
Stan	14	7	A	U	12	A	101	1		1.5	0.4
Stan	14	2	A	U	12	A	102	1		4.4	1.4
Stan	14	2	A	U	12	B	105	1		5.7	3.2
Stan	14	7	A	U	12	A	105	1		5.4	3
Stan	5	6	A	U	12	A	300	1		1.1	0.4
Stan	5	6	A	U	12	B	300	1
Stan	5	6	A	U	12	A	301	4	139736	2.4	0.7	1.4	0.7	1.9	0.6
Stan	14	7	A	U	12	B	304	1	139769	0.8	0.5																	this is the original 304
Stan	14	7	A	U	12	B	305	1	139770	1.1	0.5
Stan	5	3	A	U	12	B	306	1		1.2	0.4
Stan	5	6	A	U	12	B	307	1
Stan	5	6	A	U	12	A	308	1
Stan	5	3	A	U	12	B	309	1
Stan	14	7	A	U	12	B	310	1		1	0.3
Stan	5	6	A	U	12	A	312	5	139738	1.4	0.3	1.5	0.4	1.5	0.5
Stan	5	6	A	U	12	B	312	2
Stan	5	6	A	U	12	A	315	1	139733	4.6	0.7
Stan	5	6	A	U	12	A	316	2	139737	1.7	0.2	2	0.3
Stan	14	2	A	U	12	A	317	1
Stan	5	6	A	U	12	A	317	1	139739	1	0.3
Stan	14	7	A	U	12	A	317	2		1.3	0.4
Stan	14	7	A	U	12	A	321	1		1.2	0.2
Stan	14	7	A	U	12	A	329	1	139972	2.2	0.5
Stan	14	7	A	U	12	B	401	1																				headless
Stan	5	3	A	U	12	B	403	1
Stan	5	6	A	U	12	A	406	1	139731		0.3																	maybe 406. Antennae diff than 406-2. Head looks right. Head and thorax only.
Stan	5	3	A	U	12	B	407	1		1	0.5
Stan	5	6	A	U	12	A	407	1
Stan	5	6	A	U	12	B	407	2
Stan	5	6	A	U	12	B	410	1
Stan	14	7	A	U	12	B	412	2	139768	2.8	0.4	2.1	0.4
Stan	14	7	A	U	12	A	412	2		2.6	0.6	2.4	0.6
Stan	14	2	A	U	12	A	413	1
Stan	14	7	A	U	12	B	413	1		0.7	0.2
Stan	14	7	A	U	12	B	414	1	139762	1.2	0.3
Stan	14	2	A	U	12	B	415	1		2.7	0.4
Stan	14	7	A	U	12	B	415	3		2.6	0.4
Stan	14	7	A	U	12	B	416	1	139767	1	0.2
Stan	14	7	A	U	12	B	417	1	139766	0.9	0.2
Stan	14	2	A	U	12	A	421	1
Stan	14	2	A	U	12	B	421	1
Stan	5	6	A	U	12	A	424	1	139728	1.1	0.3
Stan	5	6	A	U	12	B	426	1		1.1	0.3
Stan	5	3	A	U	12	B	429	2																				429 before now seems polyphyletic but this one matches the larger pinned and photographed one
Stan	5	6	A	U	12	A	429	1	139729	1.4	0.4
Stan	14	7	A	U	12	B	429	1
Stan	5	6	A	U	12	A	430	1	139730	0.6	0.3
Stan	5	3	A	U	12	B	432	2
Stan	5	6	A	U	12	B	432	1
Stan	14	7	A	U	12	B	432	1
Stan	14	7	A	U	12	A	432	1		0.5	0.1
Stan	14	7	A	U	12	B	433	1	139765		0.3																	abdomen missing
Stan	14	2	A	U	12	B	434	1
Stan	14	7	A	U	12	B	434	2	139763	0.8	0.2																	both specimens incomplete
Stan	14	7	A	U	12	B	435	1	139764	0.8	0.2
Stan	14	2	A	U	12	B	439	2		2.3	0.5	2.1	0.5
Stan	5	3	A	U	12	B	440	1	139970	2	0.4
Stan	5	6	A	U	12	B	447	1
Stan	14	2	A	U	12	B	453	1	139963	1.6	0.3
Stan	5	3	A	U	12	B	457	1	139969																			head missing
Stan	5	3	A	U	12	B	458	1																				head missing, but size matches better than 429
Stan	14	7	A	U	12	A	460	1		1.2	0.4
Stan	5	3	A	U	12	B	461	1		0.8	0.2
Stan	14	2	A	U	12	B	502	1
Stan	14	2	A	U	12	B	503	1		2.4	0.7
Stan	5	6	A	U	12	A	503	1		2.4	0.8
Stan	14	2	A	U	12	A	504	1
Stan	14	2	A	U	12	B	504	1
Stan	5	3	A	U	12	B	504	3
Stan	5	6	A	U	12	A	504	1		0.6	0.3
Stan	14	7	A	U	12	A	504	1
Stan	14	2	A	U	12	A	505	1		2.4	1.1
Stan	5	6	A	U	12	B	505	1
Stan	14	2	A	U	12	B	508	1
Stan	5	6	A	U	12	B	508	1
Stan	14	2	A	U	12	A	510	1		4.4	1.2
Stan	14	7	A	U	12	B	510	2		4.4	1.1	4.4	1.3
Stan	14	7	A	U	12	A	510	2		4.1	1.1
Stan	14	7	A	U	12	B	511	2		4	1.1	4.9	1.3
Stan	14	2	A	U	12	A	515	1
Stan	14	2	A	U	12	B	515	1
Stan	5	6	A	U	12	B	515	2
Stan	5	6	A	U	12	A	520	1	139719	2.2	0.4
Stan	5	6	A	U	12	A	521	1	139720	2.8	1
Stan	5	6	A	U	12	A	522	1	139721	3	0.9
Stan	5	6	A	U	12	B	523	1
Stan	14	2	A	U	12	B	525	1		5.5	2
Stan	14	2	A	U	12	B	528	1		4.4	1.4
Stan	14	2	A	U	12	A	600	3
Stan	14	2	A	U	12	B	600	4
Stan	5	3	A	U	12	B	600	1
Stan	5	6	A	U	12	A	600	49
Stan	14	7	A	U	12	B	600	1
Stan	14	7	A	U	12	A	600	1
Stan	14	7	A	U	12	A	601	1
Stan	14	2	A	U	12	A	602	3
Stan	14	2	A	U	12	B	602	6
Stan	5	6	A	U	12	A	602	10
Stan	5	6	A	U	12	B	602	6
Stan	14	7	A	U	12	B	602	6
Stan	14	7	A	U	12	A	602	3
Stan	5	6	A	U	12	A	603	1
Stan	14	7	A	U	12	A	603	2
Stan	5	6	A	U	12	A	605	1		0.7	0.2
Stan	14	2	A	U	12	A	606	1		1.6	0.6
Stan	5	6	A	U	12	B	606	1
Stan	5	6	A	U	12	A	607	9	139722 139723	0.6	0.3	0.5	0.1	0.6	0.4
Stan	5	6	A	U	12	A	608	2	139724 139725	1.5	1	1.3	1.1
Stan	14	2	A	U	12	B	609	1		1.7	0.6
Stan	5	6	A	U	12	A	609	1	139740	1.1	0.5
Stan	14	2	A	U	12	B	611	1	139961	5.2	1.8
Stan	14	2	A	U	12	B	612	1	139962	1.6	0.7																	I'm not sure whether this one was already just a dead hollow thing
Stan	5	6	A	U	12	B	702	1		2	1.3
Stan	5	3	A	U	12	B	704	1		1.4	1
Stan	5	3	A	U	12	B	705	1		3.2	1.1
Stan	14	7	A	U	12	A	705	1
Stan	5	6	A	U	12	A	707	1		7.6	0.6
Stan	14	2	A	U	12	A	708	1		2.6	1.2
Stan	5	6	A	U	12	A	710	1	139734	5.5	4.3
Stan	5	6	A	U	12	A	712	3	139732	6.1	1.7	5.5	2.2	5.8	2.3
Stan	14	2	A	U	12	A	713	2		6.1	1.3	7.2	1.1
Stan	14	2	A	U	12	A	713	1
Stan	5	3	A	U	12	B	713	1		7.8	1.6
Stan	14	7	A	U	12	B	713	1	139773	5.7	1.2
Stan	14	7	A	U	12	A	713	1		6.5	1.5
Stan	14	7	A	U	12	B	714	1		5.6	1.5
Stan	5	6	A	U	12	A	716	1
Stan	14	2	A	U	12	B	718	2		2.3	0.5
Stan	5	6	A	U	12	A	720	1	139735	4.5	3
Stan	5	3	A	U	12	B	723	1		1.5	0.6
Stan	14	2	A	U	12	B	724	1		6.3	1.6
Stan	14	7	A	U	12	A	732	1	139971	1.1	0.3
Stan	14	2	A	U	12	B	801	1
Stan	14	7	A	U	12	B	801	4	139772	1.2	0.5	0.9	0.4
Stan	14	2	A	U	12	A	802	1
Stan	14	2	A	U	12	B	803	1
Stan	5	3	A	U	12	B	803	1
Stan	5	6	A	U	12	A	803	3		1	0.4	0.7	0.3
Stan	5	6	A	U	12	B	803	1
Stan	14	2	A	U	12	A	805	3
Stan	14	2	A	U	12	B	805	2
Stan	5	6	A	U	12	A	805	1
Stan	5	3	A	U	12	B	806	1		1.6	0.8
Stan	14	7	A	U	12	B	806	1		0.9	0.6
Stan	14	2	A	U	12	B	807	1
Stan	5	6	A	U	12	A	808	1	139726	4.9	3
Stan	5	6	A	U	12	A	809	3	139727	0.8	0.6	0.9	0.5
Stan	14	2	A	U	12	B	900	5		0.8	0.4	0.9	0.5
Stan	14	7	A	U	12	B	900	4		0.7	0.3
Stan	14	7	A	U	12	A	900	3
Stan	14	2	A	U	12	A	901	1
Stan	14	2	A	U	12	B	901	1
Stan	5	3	A	U	12	B	901	1
Stan	14	7	A	U	12	B	901	4
Stan	14	7	A	U	12	A	901	2
Stan	14	7	A	U	12	B	902	4	139771	0.7	0.4	0.2	0.2	0.4	0.2
Stan	14	7	A	U	12	A	902	4
Stan	14	2	A	U	12	B	905	4
Stan	5	3	A	U	12	B	905	1
Stan	14	7	A	U	12	B	905	2		0.4	0.2
Stan	14	7	A	U	12	A	905	6
Stan	14	2	A	U	12	A	950	5
Stan	14	2	A	U	12	B	950	18
Stan	5	6	A	U	12	A	950	1	139742	0.9	0.3
Stan	5	6	A	U	12	B	950	12
Stan	14	7	A	U	12	B	950	8		1.1	0.3	1	0.3
Stan	14	7	A	U	12	A	950	5
Stan	5	3	A	U	12	B	951	120
Stan	5	6	A	U	12	A	951	5		0.7	0.2
Stan	5	6	A	U	12	B	951	2
Stan	14	7	A	U	12	B	951	2
Stan	14	7	A	U	12	A	951	2
Stan	5	3	A	U	12	B	955	1
Stan	5	6	A	U	12	A	956	1	139743	0.8	0.1
Stan	14	2	A	U	12	A	957	1
Stan	14	2	A	U	12	B	957	2		1.6	1.3	0.6	0.3
Stan	5	3	A	U	12	B	957	1
Stan	5	6	A	U	12	B	957	1
Stan	5	3	A	U	12	B	958	46
Stan	5	6	A	U	12	A	958	3	139741	0.7	0.2
Stan	5	6	A	U	12	B	958	5
Stan	14	7	A	U	12	B	958	1		0.3	0.1
Stan	5	3	A	U	12	B	969	1		2.2	1
Stan	14	7	A	U	12	A	304-6July	1		0.8	0.3
Stan	14	2	A	U	12	A	406-2	1
Stan	5	3	A	U	12	B	406-2	7		1.6	0.3	1.5	0.4
Stan	5	6	A	U	12	B	406-2	1
Stan	14	2	A	G	7	A	1	342
Stan	14	2	A	G	7	B	1	202
Stan	5	3	A	G	7	B	1	827
Stan	5	3	A	G	7	A	1	528
Stan	5	3	A	G	7	D	1	520
Stan	5	6	A	G	7	B	1	288
Stan	5	6	A	G	7	A	1	187
Stan	14	7	A	G	7	B	1	57
Stan	14	7	A	G	7	A	1	32
Stan	5	3	A	G	7	A	10	2		7	2.8	6.9	2.1
Stan	14	7	A	G	7	B	10	4		4.8	1.9	5	1.5	4.8	1.9
Stan	14	2	A	G	7	A	30	1
Stan	5	3	A	G	7	B	30	9
Stan	5	3	A	G	7	A	30	1		1	0.1
Stan	5	6	A	G	7	B	30	2		1.1	0.2
Stan	5	6	A	G	7	A	30	1
Stan	14	7	A	G	7	A	30	3
Stan	14	2	A	G	7	A	31	3
Stan	14	2	A	G	7	B	31	1		1	0.1
Stan	5	3	A	G	7	B	31	30
Stan	5	3	A	G	7	A	31	6
Stan	5	3	A	G	7	D	31	2
Stan	5	6	A	G	7	B	31	19		1.1	0.1	1.1	0.2
Stan	5	6	A	G	7	A	31	4
Stan	14	7	A	G	7	B	31	10		0.7	0.2
Stan	14	7	A	G	7	A	31	14
Stan	14	2	A	G	7	A	32	4
Stan	14	2	A	G	7	B	32	4
Stan	5	3	A	G	7	B	32	3
Stan	5	3	A	G	7	A	32	17
Stan	5	3	A	G	7	D	32	3
Stan	5	6	A	G	7	B	32	12
Stan	5	6	A	G	7	A	32	5
Stan	14	7	A	G	7	B	32	13		0.9	0.3	1	0.3
Stan	14	7	A	G	7	A	32	10
Stan	5	3	A	G	7	B	33	1
Stan	14	2	A	G	7	B	100	1
Stan	14	2	A	G	7	A	101	1		1.4	0.6
Stan	5	6	A	G	7	A	101	1	yes	1.2	0.5																	Meloidae? Summer 09 ID
Stan	5	3	A	G	7	C	102	1		3.7	1.4
Stan	5	6	A	G	7	A	103	1	yes	0.5	0.5
Stan	14	2	A	G	7	A	105	1		4	2.7																	partway between larvae and adult
Stan	5	3	A	G	7	A	106	5	139886 139887	1.8	0.9	1.6	0.7	1.7	1
Stan	5	3	A	G	7	D	300	1
Stan	5	6	A	G	7	A	300	1		1	0.4
Stan	14	7	A	G	7	B	301	1
Stan	5	6	A	G	7	A	302	2	yes	2.5	1																	Bibionidae? Summer 09 ID
Stan	5	6	A	G	7	A	304	1	yes	0.8	0.3																	Sciaridae? Summer 09 ID
Stan	14	7	A	G	7	B	306	1
Stan	14	7	A	G	7	A	306	1		1.1	0.4
Stan	5	6	A	G	7	A	309	4	yes	1.5	0.6	1.8	0.5															Pipunculidae? Summer 09 ID
Stan	14	7	A	G	7	A	309	1
Stan	5	6	A	G	7	A	310	1	yes	0.9	0.3
Stan	5	6	A	G	7	B	312	4	yes-2	1.7	0.3	1.9	0.4
Stan	5	6	A	G	7	B	313	1	yes	1.2	0.2
Stan	5	6	A	G	7	B	314	1	yes	1.1	0.2
Stan	5	3	A	G	7	A	322	1	139888	0.9	0.2
Stan	14	2	A	G	7	B	333	1	140031	6.5	2.5
Stan	5	6	A	G	7	A	403	1																				not actually found Summer 10, ID'd Summer 09
Stan	14	7	A	G	7	A	405	1
Stan	14	2	A	G	7	A	407	1
Stan	14	2	A	G	7	B	407	2		1	0.3	0.7	0.3
Stan	5	6	A	G	7	B	407	1	yes	0.8	0.2
Stan	14	7	A	G	7	A	407	1		1	0.5
Stan	5	3	A	G	7	B	409	1	139795	0.7	0.3
Stan	5	3	A	G	7	A	410	3		0.5	0.1
Stan	14	7	A	G	7	A	412	1		3.4	0.7
Stan	5	3	A	G	7	B	420	1
Stan	5	3	A	G	7	B	425	6	139797	0.7	0.2
Stan	5	3	A	G	7	A	425	1
Stan	5	3	A	G	7	D	425	3
Stan	5	6	A	G	7	A	425	1		0.9	0.3																	Encyrtidae? Summer 09 ID
Stan	14	7	A	G	7	B	425	3		1	0.3	0.9	0.3
Stan	14	7	A	G	7	A	425	7		0.9	0.3	0.9	0.4
Stan	5	3	A	G	7	B	429	2		0.6	0.2
Stan	14	7	A	G	7	B	429	2
Stan	14	7	A	G	7	A	429	2		0.8	0.3
Stan	5	3	A	G	7	B	432	1		0.5	0.1
Stan	5	3	A	G	7	A	432	2		0.5	0.1
Stan	5	3	A	G	7	D	432	5
Stan	14	7	A	G	7	A	432	1		0.4	0.1
Stan	5	3	A	G	7	B	434	1		0.4	0.1
Stan	5	3	A	G	7	B	438	1	139796	1.2	0.4
Stan	14	7	A	G	7	A	462	1		0.9	0.3
Stan	14	2	A	G	7	B	500	2		5.2	2.4
Stan	14	7	A	G	7	A	500	2		5.3	3.2
Stan	5	3	A	G	7	B	501	9
Stan	5	3	A	G	7	A	501	20		3.7	1.1	2.8	1	3.1	1
Stan	5	3	A	G	7	C	501	7		2.5	0.8	3.8	1.1
Stan	5	6	A	G	7	B	501	6		2.4	1	2.5	1	2.9	0.7
Stan	5	6	A	G	7	A	501	12
Stan	14	7	A	G	7	A	501	19		2.9	1.1	3.1	1
Stan	14	7	A	G	7	B	501	23		2.7	0.9	2.4	0.9	2.7	1
Stan	14	2	A	G	7	A	502	2
Stan	14	2	A	G	7	B	502	1		0.6	0.2
Stan	5	3	A	G	7	B	502	6		5	1.7
Stan	5	3	A	G	7	A	502	1		2	0.9
Stan	5	3	A	G	7	C	502	3		0.8	0.3
Stan	5	6	A	G	7	B	502	1		1.1	0.5
Stan	5	6	A	G	7	B	502	1		1	0.4
Stan	14	7	A	G	7	A	502	14		2	0.9
Stan	14	7	A	G	7	B	502	16		1	0.5	1.4	0.7	0.7	0.2
Stan	5	3	A	G	7	B	503	1		2.1	0.5
Stan	5	3	A	G	7	A	503	1		1.8	0.6
Stan	5	3	A	G	7	C	503	1		4.6	0.9
Stan	14	2	A	G	7	A	504	2
Stan	5	3	A	G	7	B	504	2
Stan	5	3	A	G	7	A	504	75		1.7	0.8	1.3	0.4	0.7	0.3	0.9	0.3
Stan	5	3	A	G	7	D	504	11		1.2	0.4
Stan	5	3	A	G	7	D	504	8
Stan	14	7	A	G	7	B	504	1
Stan	5	3	A	G	7	D	505	1		2.4	0.7
Stan	14	2	A	G	7	B	506	2		4	0.7	2.6	0.8
Stan	5	3	A	G	7	B	506	1	139789	3	0.9
Stan	5	3	A	G	7	D	506	7		3.8	0.8	2.9	0.7
Stan	14	2	A	G	7	A	507	2
Stan	5	3	A	G	7	B	507	2	139790	2.4	0.7
Stan	5	3	A	G	7	A	507	36		2.6	0.7	2.8	1	2.4	0.9
Stan	5	3	A	G	7	D	507	21		2.9	1	2.1	0.4	1.3	0.6
Stan	14	7	A	G	7	A	507	1		2	0.7
Stan	14	7	A	G	7	B	507	3		2.7	0.6
Stan	14	2	A	G	7	B	508	1		2.1	0.3
Stan	5	3	A	G	7	B	508	1	139798	0.9	0.2
Stan	5	3	A	G	7	A	508	47		1.6	0.3	1.9	0.4	1.4	0.2	1.6	0.3
Stan	5	3	A	G	7	D	508	17
Stan	14	2	A	G	7	B	510	1		3.2	0.9
Stan	5	3	A	G	7	B	510	3	139788
Stan	5	3	A	G	7	C	510	3
Stan	14	7	A	G	7	B	510	1		4.5	1.1
Stan	14	7	A	G	7	B	511	1		5.1	1.3
Stan	5	3	A	G	7	D	512	1		2.2	0.5
Stan	14	7	A	G	7	A	512	1		2.2	0.9
Stan	5	6	A	G	7	B	513	1	yes	1.3	0.5
Stan	5	6	A	G	7	B	514	1	yes	1.5	0.5
Stan	5	3	A	G	7	B	515	3
Stan	5	3	A	G	7	A	515	5		2.6	1	1.6	0.6
Stan	5	3	A	G	7	C	515	8		1.2	0.5
Stan	5	3	A	G	7	D	515	47		2.1	0.6	1.8	0.6
Stan	5	6	A	G	7	B	515	1	yes	0.9	0.4
Stan	5	6	A	G	7	A	515	2
Stan	14	7	A	G	7	A	515	1
Stan	5	6	A	G	7	B	516	1	lost in sample	0.7	0.2
Stan	5	3	A	G	7	D	517	1
Stan	14	7	A	G	7	A	518	2		2.3	0.7
Stan	14	7	A	G	7	A	519	2		5.2	3.6
Stan	14	7	A	G	7	A	520	1		2.4	1.9
Stan	14	7	A	G	7	A	523	1		1.9	0.9
Stan	5	3	A	G	7	C	524	1		2.7	0.7
Stan	5	3	A	G	7	D	532	1	140006	4.8	1.8
Stan	14	2	A	G	7	A	600	48
Stan	14	2	A	G	7	B	600	17		1	0.3	0.9	0.3
Stan	5	6	A	G	7	B	600	42		1.1	0.5	0.5	0.3	1.5	1
Stan	5	6	A	G	7	A	600	20
Stan	14	7	A	G	7	B	600	4
Stan	14	7	A	G	7	A	600	18
Stan	14	2	A	G	7	A	601	1
Stan	5	3	A	G	7	B	601	5
Stan	5	3	A	G	7	A	601	9		0.7	0.6	0.7	0.4
Stan	5	3	A	G	7	D	601	9
Stan	14	7	A	G	7	B	601	1
Stan	14	2	A	G	7	A	602	15
Stan	14	2	A	G	7	B	602	31		0.6	0.3	0.4	0.2
Stan	5	3	A	G	7	B	602	3	139791	1.2	0.7
Stan	5	3	A	G	7	A	602	7		0.5	0.3	0.4	0.2
Stan	5	3	A	G	7	D	602	3
Stan	5	6	A	G	7	B	602	12		0.8	0.4	1	0.5	0.4	0.3
Stan	5	6	A	G	7	A	602	8
Stan	14	7	A	G	7	B	602	13
Stan	14	7	A	G	7	A	602	4
Stan	5	3	A	G	7	B	603	2
Stan	5	3	A	G	7	A	603	2
Stan	5	3	A	G	7	D	603	1
Stan	14	7	A	G	7	B	603	1		2.4	1
Stan	14	7	A	G	7	A	603	2
Stan	5	3	A	G	7	A	604	1		1.1	0.7
Stan	5	3	A	G	7	B	605	1		0.4	0.3
Stan	5	6	A	G	7	B	605	1		0.5	0.2
Stan	5	6	A	G	7	A	605	1
Stan	14	2	A	G	7	B	606	1		1.2	0.5
Stan	14	7	A	G	7	A	606	1		1.1	0.6
Stan	14	2	A	G	7	B	608	2		1.6	0.9	1.4	0.7
Stan	5	3	A	G	7	A	608	1		0.9	0.4
Stan	14	7	A	G	7	A	608	2
Stan	14	2	A	G	7	B	609	1		1.3	0.5
Stan	14	2	A	G	7	B	612	2		0.4	0.3
Stan	14	2	A	G	7	A	700	1
Stan	14	2	A	G	7	B	700	1		7.3	0.7
Stan	5	6	A	G	7	B	700	2	yes
Stan	14	7	A	G	7	A	700	4		2.3	0.5
Stan	14	2	A	G	7	B	701	1		3.7	1.4
Stan	14	7	A	G	7	A	701	6		2.9	1	3.5	1.4
Stan	5	3	A	G	7	B	702	1		2.3	1.6
Stan	5	3	A	G	7	D	702	1		1.8	1.2
Stan	5	6	A	G	7	B	702	1	yes	5.5	4
Stan	14	2	A	G	7	A	703	1
Stan	5	6	A	G	7	B	705	1		3.3	0.9
Stan	14	7	A	G	7	A	705	5		3.1	1.2	2.4	1.1
Stan	14	7	A	G	7	B	705	6		3.6	1.3	3.1	1.2
Stan	5	3	A	G	7	C	706	2		1.5	0.6
Stan	5	3	A	G	7	C	707	2		9.5	0.6
Stan	14	7	A	G	7	A	708	1		3.5	1.4
Stan	5	3	A	G	7	A	710	2		2	1.2	1.7	0.9
Stan	5	6	A	G	7	B	710	1	yes	5.5	4
Stan	5	6	A	G	7	A	710	1		3.6	2
Stan	5	3	A	G	7	C	713	1		6.3	1.2
Stan	14	7	A	G	7	A	716	2
Stan	14	2	A	G	7	B	717	1		9.9	5.9
Stan	5	6	A	G	7	B	717	1	yes	10	3.5
Stan	14	2	A	G	7	B	720	1		6.9	5.7
Stan	5	3	A	G	7	C	720	1		2.5	2.2
Stan	14	7	A	G	7	A	721	1		2.9	1.2
Stan	14	7	A	G	7	B	721	2
Stan	14	7	A	G	7	A	721	2
Stan	5	3	A	G	7	B	723	1	139792	1.9	0.7
Stan	5	3	A	G	7	C	724	1		6.2	1.5
Stan	14	7	A	G	7	A	727	1		6.9	2.3
Stan	5	3	A	G	7	A	730	1	139889	2.5	0.7
Stan	14	7	A	G	7	B	732	3		1.5	0.3
Stan	14	7	A	G	7	A	732	2
Stan	14	7	A	G	7	A	733	1		1.5	0.9
Stan	14	7	A	G	7	B	734	2	139959 139960	1.3	0.8	2	0.8
Stan	14	2	A	G	7	B	736	2	140032	2.8	1.9	3.2	1,8
Stan	5	3	A	G	7	D	742	1	140005	1.1	0.6
Stan	14	7	A	G	7	A	743	2	139999	8.5	2.5	8	2.6
Stan	5	3	A	G	7	B	801	3		1.3	0.6	0.9	0.9
Stan	5	3	A	G	7	A	801	1		1.1	0.5
Stan	5	3	A	G	7	C	801	1
Stan	5	3	A	G	7	D	801	1
Stan	5	3	A	G	7	D	802	1
Stan	5	3	A	G	7	B	803	2
Stan	5	3	A	G	7	A	803	29		1.2	0.6	1.5	0.5	1.3	0.5
Stan	5	3	A	G	7	C	803	3
Stan	5	3	A	G	7	D	803	10
Stan	14	7	A	G	7	A	803	3		1	0.4	1	0.4
Stan	14	7	A	G	7	B	803	1
Stan	5	3	A	G	7	B	804	1		2.5	1
Stan	14	2	A	G	7	A	805	4
Stan	14	2	A	G	7	B	805	1		0.4	0.3
Stan	5	6	A	G	7	B	805	5		0.4	0.2
Stan	5	6	A	G	7	A	806	1		1.6	0.6
Stan	14	7	A	G	7	A	806	1		1.2	0.4
Stan	14	7	A	G	7	A	810	1		1.1	0.6
Stan	14	7	A	G	7	B	900	1		0.7	0.4
Stan	14	2	A	G	7	A	901	2
Stan	14	2	A	G	7	B	901	1
Stan	5	3	A	G	7	B	901	35
Stan	5	3	A	G	7	A	901	150
Stan	5	3	A	G	7	D	901	238
Stan	5	6	A	G	7	B	901	5		0.4	0.2
Stan	5	6	A	G	7	A	901	11
Stan	14	7	A	G	7	B	901	12
Stan	14	7	A	G	7	A	901	3
Stan	5	3	A	G	7	B	902	1
Stan	5	3	A	G	7	A	902	1
Stan	5	3	A	G	7	B	905	1
Stan	5	3	A	G	7	D	905	1
Stan	5	3	A	G	7	A	907	1
Stan	5	3	A	G	7	D	907	2
Stan	5	3	A	G	7	B	908	2	139794	0.6	0.4
Stan	5	3	A	G	7	A	910	1
Stan	5	3	A	G	7	A	911	1	139890	0.4	0.3
Stan	5	3	A	G	7	D	911	2
Stan	14	2	A	G	7	B	950	2		1.1	0.3	0.4	0.1
Stan	5	3	A	G	7	B	950	2		0.8	0.3
Stan	5	3	A	G	7	A	950	1
Stan	5	3	A	G	7	D	950	1
Stan	14	2	A	G	7	A	951	4
Stan	14	2	A	G	7	B	951	1
Stan	5	3	A	G	7	B	951	24
Stan	5	3	A	G	7	A	951	11
Stan	5	3	A	G	7	D	951	9
Stan	5	6	A	G	7	B	951	3		0.7	0.2	0.8	0.3
Stan	5	6	A	G	7	A	951	2
Stan	14	7	A	G	7	B	951	1
Stan	14	7	A	G	7	A	951	2
Stan	5	3	A	G	7	A	952	1		0.4	0.3
Stan	14	7	A	G	7	B	952	1
Stan	5	3	A	G	7	B	953	4		0.8	0.1	1	0.3
Stan	14	2	A	G	7	B	955	1		0.5	0.1
Stan	5	3	A	G	7	B	955	2		0.6	0.2	0.6	0.2
Stan	5	6	A	G	7	B	955	1	yes	0.6	0.2
Stan	5	6	A	G	7	A	955	1	139906	0.6	0.1
Stan	5	6	A	G	7	A	956	1	yes	0.7	0.2
Stan	5	3	A	G	7	B	957	1	139799	0.9	0.4
Stan	14	2	A	G	7	B	958	1
Stan	5	3	A	G	7	B	962	1	139793	2.4	0.6
Stan	5	3	A	G	7	D	962	1		1.6	0.3
Stan	14	2	A	G	7	B	406-2	2		1.5	0.3	1.7	0.3
Stan	5	6	A	G	7	B	406-2	2	yes	1	0.3
Stan	14	7	A	G	7	B	406-2	1		1.2	0.4
Stan	14	2	A	G	4	A	1	208
Stan	14	2	A	G	4	B	1	187
Stan	5	3	A	G	4	A	1	578
Stan	5	3	A	G	4	B	1	203
Stan	5	6	A	G	4	A	1	244
Stan	5	6	A	G	4	B	1	58
Stan	14	7	A	G	4	A	1	23
Stan	14	7	A	G	4	B	1	12
Stan	5	3	A	G	4	A	10	3		3	1.2	3.9	1
Stan	5	3	A	G	4	B	10	1		6.4	1.5
Stan	5	6	A	G	4	B	10	2	139761	6.1	2	8	2.6
Stan	14	7	A	G	4	B	10	2		4.5	1.3	3.6	1.3
Stan	14	2	A	G	4	B	10	1		6.9	2.5
Stan	5	3	A	G	4	A	30	6
Stan	5	3	A	G	4	B	30	19
Stan	5	6	A	G	4	A	30	9
Stan	14	7	A	G	4	A	30	6
Stan	14	2	A	G	4	A	31	3
Stan	14	2	A	G	4	B	31	1
Stan	5	3	A	G	4	A	31	22
Stan	5	3	A	G	4	B	31	39
Stan	5	6	A	G	4	A	31	11
Stan	5	6	A	G	4	B	31	4
Stan	14	7	A	G	4	A	31	42
Stan	14	7	A	G	4	B	31	8
Stan	14	2	A	G	4	A	32	3
Stan	14	2	A	G	4	B	32	2
Stan	5	3	A	G	4	A	32	18
Stan	5	3	A	G	4	B	32	11
Stan	5	6	A	G	4	A	32	2
Stan	5	6	A	G	4	B	32	1
Stan	14	7	A	G	4	A	32	23
Stan	14	7	A	G	4	B	32	7
Stan	14	7	A	G	4	A	33	2	yes	0.8	0.1	0.8	0.2
Stan	14	7	A	G	4	B	33	2		0.9	0.3
Stan	14	2	A	G	4	A	100	2		3.5	1.4	3.8	1.5
Stan	5	3	A	G	4	A	101	4
Stan	5	6	A	G	4	B	101	3		0.9	0.6	0.9	0.7
Stan	5	3	A	G	4	A	102	1		2.4	0.9																	no hairs on elytra or thorax
Stan	14	2	A	G	4	A	105	1		4.9	2.6
Stan	5	3	A	G	4	B	105	1
Stan	5	3	A	G	4	A	106	2		1.9	1	1.6	0.7
Stan	5	3	A	G	4	A	107	2	139921	1.7	0.7	1.6	0.6
Stan	5	3	A	G	4	B	108	1	139943	2	1.3
Stan	5	3	A	G	4	A	300	1
Stan	5	6	A	G	4	A	300	1		0.8	0.3
Stan	5	6	A	G	4	B	300	1
Stan	14	7	A	G	4	A	300	2
Stan	14	7	A	G	4	B	300	2		1.6	0.4
Stan	14	2	A	G	4	B	301	1
Stan	5	3	A	G	4	A	301	11		2.3	0.7	2.6	0.7
Stan	5	3	A	G	4	B	301	15
Stan	14	7	A	G	4	A	305	1
Stan	5	3	A	G	4	A	307	1
Stan	14	7	A	G	4	A	307	1	yes	1.2	0.2
Stan	14	7	A	G	4	A	307	1		1.3	0.2
Stan	14	7	A	G	4	B	307	1																				uncertain; only thorax and abdomen
Stan	5	3	A	G	4	B	309	1
Stan	5	6	A	G	4	A	309	1		1.8	0.5																	wing veins look the same, but abdomen looks full of blood
Stan	5	6	A	G	4	B	309	1																				wing veins look the same, but abdomen looks full of blood
Stan	14	7	A	G	4	B	309	1		1.2	0.4
Stan	5	3	A	G	4	B	311	1
Stan	5	3	A	G	4	A	312	8		1.9	0.6	1.8	0.6
Stan	5	3	A	G	4	B	312	5
Stan	14	7	A	G	4	A	313	1	yes	1.2	0.4
Stan	5	3	A	G	4	B	315	1		5.7	1.4
Stan	5	3	A	G	4	A	321	1	139923	0.9	0.2
Stan	5	3	A	G	4	B	403	1
Stan	5	3	A	G	4	A	404	1
Stan	14	7	A	G	4	A	404	1	139861	1.7	0.4
Stan	5	3	A	G	4	B	405	1
Stan	14	2	A	G	4	A	407	1		0.7	0.2
Stan	5	6	A	G	4	A	407	1		0.9	0.3
Stan	5	6	A	G	4	B	407	1		0.6	0.2
Stan	14	7	A	G	4	B	407	1
Stan	5	3	A	G	4	A	409	1		0.8	0.3
Stan	5	3	A	G	4	A	410	1
Stan	5	3	A	G	4	B	410	5
Stan	5	6	A	G	4	A	410	1
Stan	14	7	A	G	4	A	410	1	yes	0.6	0.1
Stan	14	7	A	G	4	B	410	1		0.5	0.1
Stan	14	7	A	G	4	A	412	1	139860	2.6	0.5
Stan	5	3	A	G	4	B	414	2	139944 139945	0.9	0.2	1.2	0.3
Stan	5	3	A	G	4	B	415	1		3	0.6
Stan	5	6	A	G	4	A	415	1	139748	1.5	0.3
Stan	5	6	A	G	4	B	415	1
Stan	5	3	A	G	4	A	416	5		0.8	0.2
Stan	5	3	A	G	4	B	418	1
Stan	5	3	A	G	4	A	425	10		1	0.3	1.1	0.4															larger than the 416 of this sample, otherwise look similar
Stan	5	6	A	G	4	A	425	2	139746	0.8	0.3
Stan	5	6	A	G	4	B	426	1
Stan	14	7	A	G	4	A	427	1	yes	2.4	0.5
Stan	5	6	A	G	4	A	428	1		1.2	0.2
Stan	14	7	A	G	4	B	428	1	yes	1.7	0.3
Stan	14	2	A	G	4	B	429	1		1	0.3
Stan	5	3	A	G	4	A	429	1
Stan	5	3	A	G	4	B	429	4
Stan	5	6	A	G	4	A	429	1		0.8	0.2
Stan	5	6	A	G	4	B	429	3	139753	0.7	0.2																	one uncertain; only abdomen with one wing present
Stan	5	6	A	G	4	A	431	1	139745	0.9	0.1																	looks like 406-2 could have been this one; looks similar, no green
Stan	5	3	A	G	4	A	432	3
Stan	5	3	A	G	4	B	432	10
Stan	5	6	A	G	4	B	432	1	139752	0.4	0.1
Stan	5	3	A	G	4	B	434	1	139947	0.7	0.2
Stan	5	3	A	G	4	A	436	6		0.5	0.1
Stan	5	3	A	G	4	A	445	1
Stan	5	3	A	G	4	A	456	1	139922	5.8	1.2
Stan	5	3	A	G	4	A	457	1	139930	1.2	0.4																	length an estimate because head missing
Stan	5	3	A	G	4	B	459	1	139946	0.9	0.2
Stan	14	7	A	G	4	A	500	1		5.5	2.7
Stan	14	2	A	G	4	A	501	1		2.4	0.9
Stan	14	2	A	G	4	B	501	4		2.2	0.9	2.6	1
Stan	5	3	A	G	4	A	501	7
Stan	5	3	A	G	4	B	501	2
Stan	5	6	A	G	4	A	501	4		2.6	1	2.6	0.9
Stan	5	6	A	G	4	B	501	6
Stan	14	7	A	G	4	A	501	5
Stan	14	7	A	G	4	B	501	7
Stan	14	2	A	G	4	A	502	5		2.1	0.8	1.3	0.7
Stan	14	2	A	G	4	B	502	4		2.1	0.8	0.6	0.2
Stan	5	3	A	G	4	A	502	2
Stan	5	3	A	G	4	B	502	3	139948	2.3	0.9
Stan	5	6	A	G	4	A	502	8		2	0.7	1.1	0.4	2.2	0.9
Stan	5	6	A	G	4	B	502	4
Stan	14	7	A	G	4	A	502	2
Stan	14	7	A	G	4	B	502	6		1.1	0.4
Stan	14	7	A	G	4	B	503	1	yes	2.6	0.7
Stan	14	2	A	G	4	A	504	1
Stan	5	3	A	G	4	B	504	1
Stan	5	6	A	G	4	A	504	2	139747	0.4	0.2
Stan	14	2	A	G	4	A	507	1		2.4	0.7
Stan	5	3	A	G	4	A	507	3
Stan	5	3	A	G	4	B	508	1
Stan	5	3	A	G	4	A	510	1
Stan	5	6	A	G	4	A	510	2		4.1	1	3.5	1
Stan	5	6	A	G	4	B	510	3
Stan	14	7	A	G	4	A	510	4
Stan	14	7	A	G	4	B	511	1	yes	4.8	1.4
Stan	14	2	A	G	4	A	512	3		2.3	0.8
Stan	14	2	A	G	4	B	512	1
Stan	5	3	A	G	4	A	512	1
Stan	5	6	A	G	4	A	512	1		2.4	0.7
Stan	14	7	A	G	4	A	512	1
Stan	14	7	A	G	4	B	512	1
Stan	14	7	A	G	4	A	514	1
Stan	5	3	A	G	4	A	515	12
Stan	5	3	A	G	4	B	515	7
Stan	5	6	A	G	4	A	515	6		1.7	0.5	2.1	0.7	0.7	0.3
Stan	5	6	A	G	4	B	515	2	139755	2	0.7
Stan	14	7	A	G	4	B	515	1		0.8	0.3
Stan	5	6	A	G	4	A	517	4		0.6	0.2	0.5	0.2
Stan	14	7	A	G	4	B	517	1	yes	0.5	0.2
Stan	14	7	A	G	4	A	518	1	yes	2.2	0.7
Stan	14	7	A	G	4	A	519	3	yes	6.3	2.6	5.8	2.5	5.4	2.5
Stan	14	2	A	G	4	B	523	1
Stan	5	3	A	G	4	B	523	2
Stan	5	6	A	G	4	A	523	1	139750	3.5	1.2
Stan	5	6	A	G	4	A	524	1	139751	2.7	1.1
Stan	5	6	A	G	4	B	525	1	139757	5.1	2
Stan	5	6	A	G	4	B	526	1	139758	4	1.4
Stan	5	3	A	G	4	A	527	23		2	0.4	1.8	0.3	2.3	0.7
Stan	5	3	A	G	4	B	527	6
Stan	5	6	A	G	4	B	527	1	139754	1.7	0.6
Stan	5	6	A	G	4	B	528	1	139756	3.2	1
Stan	5	3	A	G	4	B	529	8
Stan	5	3	A	G	4	B	530	1	139938	6.1	1.5
Stan	5	3	A	G	4	B	531	2	139939	1.8	0.7
Stan	14	2	A	G	4	A	600	2
Stan	14	2	A	G	4	B	600	9
Stan	5	3	A	G	4	A	600	1
Stan	5	3	A	G	4	B	600	9
Stan	5	6	A	G	4	A	600	7
Stan	5	6	A	G	4	B	600	10
Stan	14	7	A	G	4	A	600	4
Stan	14	7	A	G	4	B	600	4
Stan	14	2	A	G	4	A	601	1
Stan	5	3	A	G	4	A	601	7
Stan	5	3	A	G	4	B	601	5
Stan	5	6	A	G	4	A	601	1		0.6	0.5
Stan	5	6	A	G	4	B	601	1
Stan	14	7	A	G	4	A	601	2
Stan	14	2	A	G	4	A	602	4
Stan	14	2	A	G	4	B	602	15		0.4	0.2
Stan	5	3	A	G	4	B	602	9
Stan	5	6	A	G	4	A	602	11
Stan	5	6	A	G	4	B	602	8
Stan	14	7	A	G	4	A	602	7
Stan	14	7	A	G	4	B	602	6
Stan	14	2	A	G	4	B	603	1
Stan	5	3	A	G	4	B	603	1
Stan	14	7	A	G	4	A	603	2
Stan	5	3	A	G	4	A	605	3
Stan	14	7	A	G	4	B	606	2	yes	1.5	0.7
Stan	5	6	A	G	4	A	607	2
Stan	5	6	A	G	4	B	608	1
Stan	14	7	A	G	4	A	700	11
Stan	14	7	A	G	4	B	700	4
Stan	14	7	A	G	4	A	701	1
Stan	14	7	A	G	4	B	701	1
Stan	5	3	A	G	4	A	702	1		1.3	0.9
Stan	5	3	A	G	4	A	705	2
Stan	5	3	A	G	4	B	705	1
Stan	5	6	A	G	4	A	705	1		3	0.9
Stan	14	7	A	G	4	B	705	1	yes	3.9	1.3
Stan	5	3	A	G	4	A	706	25
Stan	5	3	A	G	4	B	706	1
Stan	5	3	A	G	4	B	707	1
Stan	5	6	A	G	4	B	707	1	139760	10.2	0.8
Stan	14	2	A	G	4	B	708	1		3.1	0.6
Stan	5	3	A	G	4	A	710	7
Stan	5	6	A	G	4	A	710	2		3.2	2.8	4.8	4.3
Stan	5	6	A	G	4	B	710	7		2.9	2
Stan	5	3	A	G	4	B	712	2		5.5	2
Stan	14	7	A	G	4	A	712	2		3.1	0.6
Stan	5	3	A	G	4	B	713	1	139940	5.4	0.9
Stan	14	7	A	G	4	A	713	1		6.7	1.2
Stan	14	2	A	G	4	B	714	1		3.7	1.4
Stan	14	7	A	G	4	B	715	3		3.9	1.2	3.2	0.9
Stan	14	7	A	G	4	A	716	2
Stan	5	6	A	G	4	B	717	1		10	5.8
Stan	14	2	A	G	4	A	718	1		3.9	0.7
Stan	5	3	A	G	4	A	718	2		1	0.3
Stan	5	6	A	G	4	A	718	3		1	0.3	1.2	0.5
Stan	5	6	A	G	4	B	718	3		2.6	0.4
Stan	14	7	A	G	4	A	719	2	yes	2.5	0.4	3.1	0.3
Stan	14	7	A	G	4	A	720	2	yes-2	3	2.7	3	2.9
Stan	14	7	A	G	4	B	721	1	yes	2.9	0.8
Stan	5	6	A	G	4	B	722	1	139759	7.7	2.3
Stan	5	3	A	G	4	A	723	2		1.6	0.6
Stan	5	3	A	G	4	B	723	3
Stan	14	2	A	G	4	A	727	1		3.3	1.3
Stan	5	3	A	G	4	A	727	2		2.4	0.5
Stan	5	3	A	G	4	B	732	1	139941	1.5	0.4
Stan	5	3	A	G	4	B	733	1	139942	1.4	0.6
Stan	14	2	A	G	4	A	800	1
Stan	5	3	A	G	4	A	801	4
Stan	5	3	A	G	4	B	801	1
Stan	5	6	A	G	4	B	801	1		0.7	0.4
Stan	14	7	A	G	4	A	801	2		0.9	0.4
Stan	5	3	A	G	4	A	802	1
Stan	5	3	A	G	4	B	802	1
Stan	14	2	A	G	4	B	803	1
Stan	5	3	A	G	4	A	803	23
Stan	5	3	A	G	4	B	803	11
Stan	5	6	A	G	4	A	803	3
Stan	5	6	A	G	4	B	803	2
Stan	14	7	A	G	4	A	803	1		0.8	0.3
Stan	5	3	A	G	4	B	805	2
Stan	14	2	A	G	4	B	806	1
Stan	5	3	A	G	4	B	808	1
Stan	14	2	A	G	4	B	810	1
Stan	5	3	A	G	4	A	810	14
Stan	5	3	A	G	4	B	810	2
Stan	14	2	A	G	4	A	901	2
Stan	14	2	A	G	4	B	901	2
Stan	5	3	A	G	4	A	901	71
Stan	5	3	A	G	4	B	901	36
Stan	5	6	A	G	4	A	901	30
Stan	5	6	A	G	4	B	901	11
Stan	14	7	A	G	4	A	901	3		0.4	0.2
Stan	14	7	A	G	4	B	901	6		0.3	0.2
Stan	5	3	A	G	4	B	907	3
Stan	5	3	A	G	4	B	908	5
Stan	5	3	A	G	4	A	911	2
Stan	5	3	A	G	4	B	911	4
Stan	5	3	A	G	4	B	950	1
Stan	5	3	A	G	4	A	951	10
Stan	5	3	A	G	4	B	951	7
Stan	5	6	A	G	4	A	951	6
Stan	5	6	A	G	4	B	951	2
Stan	14	7	A	G	4	A	951	6		0.8	0.3	0.6	0.2
Stan	14	7	A	G	4	B	951	1		0.4	0.2
Stan	5	3	A	G	4	A	952	1
Stan	14	2	A	G	4	B	955	1
Stan	5	3	A	G	4	A	955	1
Stan	14	7	A	G	4	A	957	1	lost in sample	0.5	0.2
Stan	14	2	A	G	4	A	958	3
Stan	14	2	A	G	4	B	958	1
Stan	5	3	A	G	4	A	958	1
Stan	5	3	A	G	4	B	958	1
Stan	5	6	A	G	4	A	959	1	139749	4.5	1
Stan	5	6	A	G	4	A	960	1	139744	1.1	0.3
Stan	5	3	A	G	4	B	406-2	3																				not strictly the same, but this is the best classification for all of them
Stan	5	3	A	G	4	B	421-2	1
Stan	14	2	A	U	1	B	1	445
Stan	14	2	A	U	1	A	1	367
Stan	5	3	A	U	1	A	1	1
Stan	5	3	A	U	1	A	1	764
Stan	5	3	A	U	1	B	1	98
Stan	5	6	A	U	1	A	1	180
Stan	5	6	A	U	1	A-2	1	175
Stan	14	7	A	U	1	A	1	3
Stan	14	7	A	U	1	B	1	52
Stan	14	2	A	U	1	A	10	2		6.7	2.2	6.5	2
Stan	5	3	A	U	1	A	10	1		10	2.7
Stan	14	2	A	U	1	B	10	2		8.9	3	8.9	3
Stan	14	2	A	U	1	B	30	1	139929	1	0.2
Stan	14	2	A	U	1	A	30	2
Stan	5	3	A	U	1	A	30	18
Stan	5	3	A	U	1	B	30	2
Stan	5	6	A	U	1	A-2	30	1
Stan	14	7	A	U	1	A	30	5
Stan	14	7	A	U	1	B	30	1
Stan	14	2	A	U	1	A	31	1
Stan	5	3	A	U	1	A	31	26
Stan	5	3	A	U	1	B	31	1	139958	0.9	0.2
Stan	5	6	A	U	1	A	31	47
Stan	5	6	A	U	1	A-2	31	75
Stan	14	7	A	U	1	A	31	32
Stan	14	7	A	U	1	B	31	15
Stan	5	3	A	U	1	A	32	5
Stan	5	3	A	U	1	B	32	10
Stan	5	6	A	U	1	A	32	4
Stan	5	6	A	U	1	A-2	32	4
Stan	14	7	A	U	1	A	32	6
Stan	14	7	A	U	1	B	32	7		0.7	0.2	0.8	0.2
Stan	5	3	A	U	1	A	33	1
Stan	5	6	A	U	1	A	33	2
Stan	5	6	A	U	1	A-2	33	6
Stan	14	7	A	U	1	A	33	3		0.8	0.2
Stan	14	2	A	U	1	B	100	1		2.5	1
Stan	5	3	A	U	1	B	102	1		4	1.5
Stan	5	3	A	U	1	A	105	2		6.2	3	2	0.5															one is a larvae
Stan	5	3	A	U	1	B	105	2		5.2	2.6
Stan	5	6	A	U	1	A-2	108	1	139998
Stan	5	3	A	U	1	B	109	1	139950	2.3	1.2
Stan	14	2	A	U	1	B	300	1
Stan	5	3	A	U	1	A	301	3		2.2	0.4	1.8	0.6
Stan	5	3	A	U	1	B	301	16
Stan	14	7	A	U	1	B	301	1		2.2	0.4
Stan	5	3	A	U	1	B	306	1		1.2	0.2
Stan	5	6	A	U	1	A	306	1
Stan	14	7	A	U	1	B	307	1		1.3	0.2
Stan	5	6	A	U	1	A-2	308	1	139993
Stan	5	3	A	U	1	A	309	2		1.5	0.6
Stan	5	3	A	U	1	B	310	1
Stan	5	3	A	U	1	A	311	3	139872	0.8	0.3
Stan	14	7	A	U	1	A	311	1		2	0.3
Stan	5	3	A	U	1	A	312	3		1.1	0.4	1.5	0.4
Stan	5	3	A	U	1	B	312	4
Stan	5	3	A	U	1	B	315	1		5	1.6
Stan	5	3	A	U	1	B	316	2		1.7	0.6
Stan	5	3	A	U	1	A	317	4	139873 139874	1.1	0.3	1.4	0.4	0.8	0.2
Stan	5	3	A	U	1	B	318	2		5	1.2
Stan	5	3	A	U	1	A	321	1	139875	0.7	0.2
Stan	5	3	A	U	1	B	321	3
Stan	5	3	A	U	1	A	322	1	139876	1.2	0.3
Stan	5	6	A	U	1	A-2	322	1		0.7	0.2
Stan	14	2	A	U	1	B	325	1	139926	5.6	1.9
Stan	5	3	A	U	1	B	326	2	139951	2.3	0.6																	length estimated because heads missing
Stan	5	3	A	U	1	B	327	1	139952	1.5	0.5
Stan	5	6	A	U	1	A	402	2																				no heads
Stan	5	3	A	U	1	A	403	1		0.5	0.2
Stan	5	6	A	U	1	A	403	2	139811	0.9	0.3
Stan	5	6	A	U	1	A-2	403	1		0.8	0.2
Stan	14	7	A	U	1	B	403	1
Stan	5	3	A	U	1	A	405	3	139879	1.2	0.3	1	0.1
Stan	14	7	A	U	1	A	408	1		0.8	0.3
Stan	5	3	A	U	1	A	410	3	139882	0.6	0.1	0.7	0.1
Stan	5	6	A	U	1	A	410	1	139810	0.6	0.1
Stan	5	6	A	U	1	A	412	1		2.5	0.5
Stan	5	6	A	U	1	A-2	412	2		2.1	0.5
Stan	14	7	A	U	1	A	412	2		3.2	0.7
Stan	5	3	A	U	1	A	415	1	139878	2.3	0.4
Stan	5	6	A	U	1	A	415	1
Stan	5	3	A	U	1	A	416	1
Stan	5	3	A	U	1	A	419	2	139885	0.6	0.2
Stan	5	3	A	U	1	B	419	1	139954	0.7	0.3
Stan	5	6	A	U	1	A-2	420	1
Stan	5	3	A	U	1	A	421	1
Stan	5	3	A	U	1	B	421	1
Stan	5	6	A	U	1	A-2	421	1
Stan	5	6	A	U	1	A-2	425	1
Stan	5	3	A	U	1	A	427	1	139881	2.5	0.5
Stan	5	3	A	U	1	A	429	1		0.9	0.3
Stan	5	6	A	U	1	A-2	431	1		0.8	0.1
Stan	5	3	A	U	1	A	432	12		0.5	0.1	0.5	0.1	0.5	0.1
Stan	5	3	A	U	1	B	432	3
Stan	5	6	A	U	1	A-2	432	1
Stan	5	3	A	U	1	B	433	1	139953	1.9	0.3
Stan	14	7	A	U	1	A	434	3	139802	0.6	0.2
Stan	5	6	A	U	1	A-2	439	1		1.9	0.4
Stan	14	7	A	U	1	A	439	4	139805 139806	2.2	0.6	1.1	0.3
Stan	14	7	A	U	1	A	440	2	139804	1.9	0.5	1.2	0.2
Stan	5	3	A	U	1	B	441	1
Stan	14	7	A	U	1	A	441	1	139803	0.8	0.1
Stan	5	6	A	U	1	A-2	449	1		1.2	0.3
Stan	5	3	A	U	1	A	450	1	139880	2.1	0.4
Stan	5	3	A	U	1	A	451	3	139883 139884	1.3	0.4	1	0.3
Stan	5	3	A	U	1	B	451	1	139955	0.6	0.2
Stan	5	3	A	U	1	B	457	1
Stan	5	3	A	U	1	B	460	9	139956	0.7	0.2	0.7	0.3
Stan	5	3	A	U	1	B	461	9	139957	0.9	0.3	0.8	0.2
Stan	5	6	A	U	1	A-2	466	2	139996 139997	1.3	0.5	1	0.3
Stan	5	6	A	U	1	A-2	467	1	139992	1	0.2
Stan	14	2	A	U	1	A	500	2
Stan	14	7	A	U	1	B	500	1		6.4	2.7
Stan	14	2	A	U	1	A	501	1
Stan	5	3	A	U	1	A	501	2		2.9	1	1.7	0.8
Stan	14	7	A	U	1	B	501	1		2.9	0.8
Stan	5	3	A	U	1	A	502	1
Stan	14	2	A	U	1	B	504	2
Stan	14	2	A	U	1	A	504	2
Stan	5	3	A	U	1	A	504	1
Stan	5	6	A	U	1	A	504	16
Stan	5	6	A	U	1	A	506	2	139812	4.1	1.4	3.1	1
Stan	14	2	A	U	1	A	507	3
Stan	5	3	A	U	1	B	508	1
Stan	5	6	A	U	1	A	508	1
Stan	14	2	A	U	1	A	510	1
Stan	5	3	A	U	1	A	510	4		4.5	1.1	4.9	1.2
Stan	5	6	A	U	1	A	510	1		4.8	0.8
Stan	14	7	A	U	1	A	510	1
Stan	14	7	A	U	1	B	510	7		4.3	1	3	0.7
Stan	14	2	A	U	1	A	511	1		4	1.1
Stan	14	7	A	U	1	A	511	1
Stan	14	7	A	U	1	B	511	2		4.1	1.1	5.3	1.4
Stan	14	2	A	U	1	B	512	1		2.4	0.9
Stan	5	3	A	U	1	A	515	14		5.5	0.8	2.1	0.4	1.7	0.7
Stan	5	6	A	U	1	A	515	9
Stan	14	7	A	U	1	A	515	1		0.8	0.3
Stan	5	3	A	U	1	A	517	1		1.1	0.5
Stan	5	3	A	U	1	A	518	1		2.9	0.9
Stan	14	2	A	U	1	A	523	2		2	0.5
Stan	5	3	A	U	1	B	523	1
Stan	14	2	A	U	1	A	524	1		2.5	0.9
Stan	5	3	A	U	1	A	525	1
Stan	5	3	A	U	1	A	527	1		1.5	0.3																	nymph
Stan	14	7	A	U	1	B	528	1	139816	3.4	0.8
Stan	14	2	A	U	1	B	600	7		0.7	0.4	0.8	0.2	0.4	0.2
Stan	14	2	A	U	1	A	600	3
Stan	5	3	A	U	1	A	600	11
Stan	5	3	A	U	1	B	600	34
Stan	5	6	A	U	1	A	600	3
Stan	14	7	A	U	1	B	600	3		0.6	0.3
Stan	14	2	A	U	1	B	601	5		1	0.6	0.7	0.5
Stan	14	2	A	U	1	A	601	2
Stan	5	3	A	U	1	B	601	2
Stan	14	2	A	U	1	B	602	14		0.5	0.2	0.7	0.3	0.5	0.2
Stan	14	2	A	U	1	A	602	5
Stan	5	3	A	U	1	A	602	6
Stan	5	3	A	U	1	B	602	16
Stan	5	6	A	U	1	A	602	23
Stan	5	6	A	U	1	A-2	602	1		0.9	0.7
Stan	14	7	A	U	1	A	602	8		0.7	0.4	0.3	0.1
Stan	14	7	A	U	1	B	602	10	139817	1.5	0.9
Stan	5	3	A	U	1	A	605	1		1	0.4
Stan	5	3	A	U	1	A	607	1		0.5	0.3
Stan	5	3	A	U	1	B	607	3
Stan	14	7	A	U	1	B	700	1		6.7	0.8
Stan	14	7	A	U	1	B	701	1	139815	3	0.6
Stan	5	3	A	U	1	A	702	2		1.6	1.4
Stan	14	7	A	U	1	A	702	4	139807 139808	2.1	1.1	2	1.1	2.5	1.9
Stan	14	7	A	U	1	B	704	1		2.1	1.3
Stan	14	2	A	U	1	A	705	1
Stan	5	3	A	U	1	B	706	3		1.2	0.5
Stan	14	2	A	U	1	B	707	1		9.4	0.5
Stan	5	3	A	U	1	B	707	1
Stan	14	7	A	U	1	A	709	1	139809	7.8	1.2
Stan	5	3	A	U	1	A	713	1		7.2	1.7
Stan	5	6	A	U	1	A	713	1		5.6	1
Stan	14	7	A	U	1	A	713	1		6	0.9
Stan	14	7	A	U	1	B	713	2		7.5	1.3	7.1	1.3
Stan	14	7	A	U	1	B	714	1		4.6	1.7
Stan	14	2	A	U	1	B	716	1		1.3	0.3
Stan	14	2	A	U	1	B	718	1		2.6	0.5
Stan	14	2	A	U	1	A	718	1
Stan	5	3	A	U	1	A	723	1		1.6	0.6
Stan	5	3	A	U	1	B	723	3		1.8	0.7
Stan	5	6	A	U	1	A	724	1	139813	7	1.6
Stan	14	2	A	U	1	A	731	2		9	5.3
Stan	14	2	A	U	1	A	733	1
Stan	5	3	A	U	1	A	801	2		1.1	0.5	1.1	0.7
Stan	14	7	A	U	1	A	801	2		1.1	0.5
Stan	14	2	A	U	1	B	802	1		1.9	0.9
Stan	5	3	A	U	1	A	802	1		1.7	0.7
Stan	5	3	A	U	1	B	802	2		1.5	0.6
Stan	5	3	A	U	1	A	803	8		1	0.4	1.1	0.6	1.1	0.3
Stan	5	3	A	U	1	B	803	7
Stan	5	6	A	U	1	A-2	803	3		1.3	0.4	0.7	0.4	1.3	0.5
Stan	14	7	A	U	1	B	803	1		0.5	0.3
Stan	5	3	A	U	1	B	804	1	139949	6.5	2.2
Stan	14	2	A	U	1	B	805	10		0.5	0.3
Stan	14	2	A	U	1	A	805	1
Stan	5	3	A	U	1	A	805	1		0.6	0.2
Stan	14	7	A	U	1	B	805	3
Stan	5	3	A	U	1	A	806	1		1	0.6
Stan	5	3	A	U	1	B	806	1		2	0.8
Stan	5	6	A	U	1	A-2	806	1	139994	1	0.7
Stan	14	7	A	U	1	B	806	3		0.9	0.5
Stan	5	6	A	U	1	A	807	2		1.5	0.6	1.5	0.5
Stan	5	3	A	U	1	A	809	1		0.6	0.4
Stan	14	2	A	U	1	A	810	2
Stan	5	3	A	U	1	A	810	7		0.5	0.4	0.6	0.4
Stan	14	7	A	U	1	B	810	2	139818 139819	0.8	0.5	0.9	0.5
Stan	14	7	A	U	1	A	900	2		0.7	0.5
Stan	14	7	A	U	1	B	900	2
Stan	14	2	A	U	1	A	901	1
Stan	5	3	A	U	1	A	901	3
Stan	5	3	A	U	1	A	901	31
Stan	5	3	A	U	1	B	901	28
Stan	5	6	A	U	1	A	901	3
Stan	5	6	A	U	1	A-2	901	2
Stan	14	2	A	U	1	B	902	2	139928	0.6	0.3
Stan	5	6	A	U	1	A	902	1		0.3	0.2
Stan	14	2	A	U	1	B	905	1
Stan	14	7	A	U	1	A	905	4		0.4	0.3
Stan	5	3	A	U	1	A	907	4
Stan	5	3	A	U	1	B	908	1		0.8	0.3
Stan	14	2	A	U	1	A	912	1		0.5	0.3
Stan	14	2	A	U	1	B	950	1		0.6	0.2
Stan	14	2	A	U	1	A	950	3
Stan	5	3	A	U	1	A	950	7		0.7	0.3
Stan	5	6	A	U	1	A	950	26
Stan	5	6	A	U	1	A-2	950	10
Stan	14	7	A	U	1	A	950	16		0.8	0.3
Stan	14	7	A	U	1	B	950	19		0.9	0.3
Stan	5	3	A	U	1	A	951	8
Stan	5	3	A	U	1	B	951	7
Stan	5	6	A	U	1	A	951	43
Stan	5	6	A	U	1	A-2	951	91
Stan	14	7	A	U	1	A	951	11
Stan	14	7	A	U	1	B	951	2
Stan	5	3	A	U	1	A	952	2	139877	0.9	0.3
Stan	5	3	A	U	1	B	955	1
Stan	5	6	A	U	1	A	955	4		0.6	0.2
Stan	5	6	A	U	1	A-2	955	7	139995	0.5	0.1
Stan	14	7	A	U	1	B	955	1
Stan	5	6	A	U	1	A	957	5		0.8	0.3	0.4	0.2
Stan	5	6	A	U	1	A-2	957	9		0.8	0.4
Stan	14	7	A	U	1	B	957	1	139814	1.6	0.9
Stan	5	6	A	U	1	A	958	31
Stan	5	6	A	U	1	A-2	958	64
Stan	14	2	A	U	1	B	967	1	139927	4.8	2.2
Stan	5	6	A	U	1	A-2	974	1	139991	0.8	0.4
Stan	5	6	A	U	1	A	406-2	2
Stan	5	6	A	U	1	A-2	406-2	1
Stan	14	7	A	U	1	A	406-2	1		1.5	0.2
Stan	5	3	A	U	1	B	421-2	1
Stan	5	2	M	U	12	B	1	486
Stan	5	2	M	U	12	B	10	1
Stan	14	6	M	U	12	A	30	2
Stan	5	2	M	U	12	B	31	2
Stan	14	6	M	U	12	A	31	11
Stan	5	2	M	U	12	B	32	17
Stan	14	6	M	U	12	A	32	19
Stan	5	2	M	U	12	B	107	1		1.6	0.7
Stan	5	2	M	U	12	B	300	2
Stan	5	2	M	U	12	B	312	5		2.2	0.2
Stan	5	2	M	U	12	B	328	1	139975	3.1	0.9
Stan	5	2	M	U	12	B	409	1		1	0.2
Stan	14	6	M	U	12	A	500	1		4.9	1.7
Stan	14	6	M	U	12	A	502	1		1.3	0.5
Stan	5	2	M	U	12	B	503	1		2.7	0.6
Stan	14	6	M	U	12	A	503	1		2	0.5
Stan	14	6	M	U	12	A	505	2		2.5	0.6
Stan	5	2	M	U	12	B	508	1
Stan	14	6	M	U	12	A	508	3		2.3	0.3
Stan	5	2	M	U	12	B	510	3		3.6	1.1	3.5	1.2
Stan	14	6	M	U	12	A	511	1		3.9	0.8
Stan	14	6	M	U	12	A	512	1		2.6	0.8
Stan	14	6	M	U	12	A	515	7		1.5	0.4	1.2	0.3
Stan	5	2	M	U	12	B	523	1		1.2	0.6
Stan	5	2	M	U	12	B	531	4		1.3	0.5
Stan	5	2	M	U	12	B	600	1
Stan	5	2	M	U	12	B	601	3
Stan	5	2	M	U	12	B	602	16
Stan	5	2	M	U	12	B	702	3		1.9	1.4	2	1.5
Stan	5	2	M	U	12	B	704	3		9	5.2
Stan	14	6	M	U	12	A	705	4		3	1.1	2.7	1.3
Stan	5	2	M	U	12	B	710	2		6.3	4.8	3.6	2.1
Stan	5	2	M	U	12	B	735	1	139974	8	6.7
Stan	5	2	M	U	12	B	803	1		1.3	0.6
Stan	14	6	M	U	12	A	803	16
Stan	5	2	M	U	12	B	901	1
Stan	5	2	M	U	12	B	902	2
Stan	5	2	M	U	12	B	905	1
Stan	5	2	M	U	12	B	907	1
Stan	5	2	M	U	12	B	911	2
Stan	14	6	M	U	12	A	950	1
Stan	5	2	M	U	12	B	951	32
Stan	5	2	M	U	12	B	969	2	139973	0.8	0.6
Stan	5	2	M	U	12	B	406-2	1		1.1	0.2
Stan	14	5	M	G	7	B	1	434
Stan	14	5	M	G	7	A	10	1		3.7	0.6
Stan	14	5	M	G	7	B	10	2		9.2	3.1
Stan	14	5	M	G	7	A	10	3		9.3	3.3	12.5	3
Stan	14	5	M	G	7	B	30	26
Stan	14	5	M	G	7	B	31	108	140019	1.3	0.3
Stan	14	5	M	G	7	B	32	86
Stan	14	5	M	G	7	B	33	5
Stan	14	5	M	G	7	B	105	2		5.1	3
Stan	14	5	M	G	7	B	301	1
Stan	14	5	M	G	7		301	1	140034
Stan	14	5	M	G	7	B	304	2	140020	1.7	0.5
Stan	14	5	M	G	7	B	306	2		1.4	0.5
Stan	14	5	M	G	7	B	312	1
Stan	14	5	M	G	7	B	317	2	140022	0.7	0.2
Stan	14	5	M	G	7	B	321	1	140021	0.8	0.2
Stan	14	5	M	G	7	B	323	1		1.3	0.5
Stan	14	5	M	G	7	B	328	1		2.5	0.8
Stan	14	5	M	G	7	B	416	2		0.7	0.2
Stan	14	5	M	G	7	B	417	1	140023	0.9	0.3
Stan	14	5	M	G	7	B	425	5		0.9	0.4	0.9	0.3	1	0.4
Stan	14	5	M	G	7		427	1	140035
Stan	14	5	M	G	7	B	429	1
Stan	14	5	M	G	7	B	432	4
Stan	14	5	M	G	7	B	433	1	140024	2.4	0.4
Stan	14	5	M	G	7		463	1	140033	1.6	0.3
Stan	14	5	M	G	7	B	501	1		2.5	0.8
Stan	14	6	M	G	7	A	501	6		2.9	0.9	2.8	1.1
Stan	14	5	M	G	7	B	503	9		2.3	0.5	2.7	0.6
Stan	14	5	M	G	7	A	503	4		2.7	0.4	1.9	0.6
Stan	14	5	M	G	7	B	504	17		1.1	0.4
Stan	14	5	M	G	7	A	504	38		0.4	0.1	1.3	0.4
Stan	14	5	M	G	7	B	505	4		2.5	0.7	2.1	0.6
Stan	14	6	M	G	7	A	505	1		2.2	1.1
Stan	14	5	M	G	7	B	506	2		3.7	1.1	2.8	1.1
Stan	14	5	M	G	7	A	506	4		3	0.6	2.9	0.8
Stan	14	5	M	G	7	B	507	5		1.7	0.8	2.5	1.1
Stan	14	5	M	G	7	A	507	8		3.1	0.9	1.7	0.4	2.5	0.8
Stan	14	5	M	G	7	B	508	46		2.2	0.8	2.1	0.6
Stan	14	5	M	G	7	B	508	1
Stan	14	5	M	G	7	A	508	51		2	0.3	1.2	0.2	2.4	0.3
Stan	14	5	M	G	7	B	509	1		2.5	1
Stan	14	5	M	G	7	A	509	2		2.2	0.6
Stan	14	5	M	G	7	B	510	2		2.5	1.1	4.5	1.3
Stan	14	5	M	G	7	A	510	1		4.4	1.1
Stan	14	5	M	G	7	B	511	1		4.7	1.4
Stan	14	5	M	G	7	A	512	2		2.3	0.6	2.4	0.8
Stan	14	5	M	G	7	B	515	6		2.2	0.8
Stan	14	5	M	G	7	A	515	16		2.1	0.6	1.1	0.2	2.2	0.6
Stan	14	5	M	G	7	B	523	3
Stan	14	5	M	G	7	B	525	1		4.4	1.8
Stan	14	5	M	G	7	B	600	3
Stan	14	5	M	G	7	B	602	2
Stan	14	5	M	G	7	B	701	1		3.1	1
Stan	14	5	M	G	7	A	704	1		6.4	4.5
Stan	14	5	M	G	7	B	705	6		3.7	0.9
Stan	14	5	M	G	7	A	705	2		3	1	2.9	1.1
Stan	14	5	M	G	7	A	706	2		1.8	0.8
Stan	14	5	M	G	7	B	713	2		7.5	1.9
Stan	14	5	M	G	7	B	715	1		6.1	2.2
Stan	14	5	M	G	7	B	740	1	140025	5.3	1.8
Stan	14	5	M	G	7	A	802	1
Stan	14	5	M	G	7	A	803	21
Stan	14	5	M	G	7	B	803	25		1.1	0.6	0.9	0.4
Stan	14	5	M	G	7	B	805	1
Stan	14	5	M	G	7	B	806	1		0.5	0.3
Stan	14	5	M	G	7	B	814	10		0.9	0.9	0.4	1	0.5
Stan	14	5	M	G	7	B	901	96
Stan	14	5	M	G	7		901	1	yes
Stan	14	5	M	G	7	B	911	2
Stan	14	5	M	G	7	B	950	6
Stan	14	5	M	G	7	B	951	221
Stan	14	5	M	G	7	B	957	1
Stan	14	5	M	G	7	B	958	29
Stan	14	5	M	G	7	B	962	2		3.8	0.9	3.2	0.6
Stan	14	5	M	G	7	B	406-2	2
Stan	14	5	M	G	7	B	421-2	1
Stan	5	2	M	G	4	A	10	1		6.3	1
Stan	5	2	M	G	4	A	101	1		1.5	0.6
Stan	5	2	M	G	4	A	501	2		2.2	0.7	2.5	0.6
Stan	5	2	M	G	4	A	503	4		2.8	0.2	2.4	0.3
Stan	5	2	M	G	4	A	504	3		0.7	0.1	1.4	0.3
Stan	5	2	M	G	4	A	505	1		2.9	0.7
Stan	5	2	M	G	4	A	506	4		2.7	0.7	2.8	0.7
Stan	5	2	M	G	4	A	507	4		2.9	0.6	3	0.5	2.6	0.6
Stan	5	2	M	G	4	A	508	29		2.1	0.3	1.7	0.2
Stan	5	2	M	G	4	A	510	2		2.7	0.4	2.6	0.5
Stan	5	2	M	G	4	A	515	16		2.1	0.6	1.6	0.4	2.1	0.4
Stan	5	2	M	G	4	A	528	1		3.8	1.1
Stan	5	2	M	G	4	A	702	1		2.2	1.7
Stan	5	2	M	G	4	A	704	1		6.5	4.5
Stan	5	2	M	G	4	A	709	1		5.7	0.7
Stan	5	2	M	G	4	A	802	1
Stan	5	2	M	G	4	A	803	10
Stan	5	5	M	U	1	A	1	664
Stan	14	5	M	U	1	A	10	1		6.6	1.9
Stan	5	5	M	U	1	A	30	1
Stan	5	5	M	U	1	A	32	5
Stan	5	2	M	U	1	A	103	1		0.6	0.5
Stan	5	5	M	U	1	A	106	1		1.5	0.7
Stan	5	5	M	U	1	A	301	5	139977	2	0.8
Stan	5	5	M	U	1	A	311	2
Stan	5	5	M	U	1	A	312	1
Stan	5	5	M	U	1	A	317	1
Stan	5	5	M	U	1	A	330	3	139978	1.7	0.6	1.6	0.6
Stan	5	5	M	U	1	A	331	8	139979 139980	3.1	1	2.8	0.8
Stan	5	5	M	U	1	A	407	1		1	0.5
Stan	5	5	M	U	1	A	410	2
Stan	5	5	M	U	1	A	417	1
Stan	5	5	M	U	1	A	424	2		0.7	0.1
Stan	5	5	M	U	1	A	425	7		1	0.3	0.8	0.3
Stan	5	5	M	U	1	A	432	4
Stan	5	5	M	U	1	A	462	1	139981	1.2	0.3
Stan	5	5	M	U	1	A	463	1	139982	1.2	0.2
Stan	5	2	M	U	1	A	501	1		2.4	0.4
Stan	5	5	M	U	1	A	501	1		3.9	0.9
Stan	5	5	M	U	1	A	502	2
Stan	5	2	M	U	1	A	503	3		1.9	0.6	2.3	0.2
Stan	5	5	M	U	1	A	503	4
Stan	14	5	M	U	1	A	503	1		2	0.3
Stan	5	2	M	U	1	A	504	6		2.1	0.5	0.9	0.2	0.6	0.2
Stan	5	5	M	U	1	A	504	3
Stan	5	5	M	U	1	A	505	2			2.5	0.7
Stan	14	5	M	U	1	A	505	1		2.6	0.8
Stan	14	5	M	U	1	A	506	1		2.9	1
Stan	5	2	M	U	1	A	507	1
Stan	5	5	M	U	1	A	507	1		1.1	0.7
Stan	14	5	M	U	1	A	507	1		2.9	0.7
Stan	5	2	M	U	1	A	508	11
Stan	5	5	M	U	1	A	508	10		2	0.6	2.4	0.4
Stan	5	2	M	U	1	A	509	1		2.2	0.7
Stan	5	2	M	U	1	A	510	1		3.2	0.9
Stan	5	2	M	U	1	A	512	4		2.5	0.5	1.8	0.6
Stan	5	5	M	U	1	A	512	1		2.8	0.9
Stan	5	2	M	U	1	A	515	33		2	0.6	2.5	0.7	1.4	0.4
Stan	5	5	M	U	1	A	515	35		2.2	0.9	1.2	0.4
Stan	5	5	M	U	1	A	515	12
Stan	5	2	M	U	1	A	522	2		2.8	0.6
Stan	5	5	M	U	1	A	525	1		5.3	2
Stan	5	2	M	U	1	A	528	2		3.1	0.6	3.3	0.9
Stan	5	5	M	U	1	A	530	1		4.3	1.5
Stan	5	5	M	U	1	A	600	3
Stan	5	5	M	U	1	A	601	1
Stan	5	5	M	U	1	A	602	3
Stan	14	5	M	U	1	A	701	1		3.5	1.4
Stan	5	5	M	U	1	A	704	2		4.4	2.5	4.1	2.6
Stan	5	5	M	U	1	A	728	4		3.3	2.6	3.4	2.6	4.6	3.8
Stan	5	5	M	U	1	A	730	1	139983	3.2	0.7
Stan	5	5	M	U	1	A	737	1	139984	7.5	3.5
Stan	5	5	M	U	1	A	738	1	139985	1.7	1.1
Stan	14	5	M	U	1	A	801	1
Stan	5	5	M	U	1	A	802	1		0.9	0.3
Stan	5	5	M	U	1	A	803	24
Stan	5	5	M	U	1	A	805	2
Stan	5	5	M	U	1	A	810	4
Stan	5	5	M	U	1	A	900	1
Stan	5	5	M	U	1	A	901	31
Stan	5	5	M	U	1	A	907	2
Stan	5	5	M	U	1	A	911	2
Stan	5	5	M	U	1	A	950	1
Stan	5	5	M	U	1	A	951	22
Stan	5	5	M	U	1	A	962	1		14	1.1
Stan	5	5	M	U	1	A	970	1		0.4	0.2
Stan	5	5	M	U	1	A	971	10	139987 139988	0.8	0.2	0.6	0.2	0.5	0.2
Stan	5	1	P	U	12	A	1	206
Stan	5	1	P	U	12	B	1	234
Stan	14	3	P	U	12	A	1	179	yes
Stan	14	3	P	U	12	B	1	23																				most are the tan kind without stripes
Stan	5	4	P	U	12	A	1	464
Stan	5	4	P	U	12	B	1	293
Stan	14	4	P	U	12	A	1	137
Stan	14	4	P	U	12	B	1	458
Stan	14	3	P	U	12	A	2	1	yes	1.2	0.6
Stan	14	3	P	U	12	B	2	2		1.5	0.5	0.9	0.4
Stan	14	4	P	U	12	A	10	1		7.5	2.5
Stan	5	4	P	U	12	B	10	1
Stan	14	4	P	U	12	A	10	1
Stan	14	4	P	U	12	B	10	2		6.5	1.9	6.3	1.7
Stan	5	1	P	U	12	A	30	2
Stan	5	1	P	U	12	B	30	10
Stan	14	3	P	U	12	B	30	7		1	0.2	1.1	0.2	1	0.3	0.9	0.3	1	0.2
Stan	14	3	P	U	12	A	30	6
Stan	5	4	P	U	12	B	30	2
Stan	14	4	P	U	12	A	30	2
Stan	14	4	P	U	12	B	30	4		1	0.2
Stan	5	1	P	U	12	A	31	28
Stan	5	1	P	U	12	B	31	45
Stan	14	3	P	U	12	B	31	3		1.1	0.3	1.7	0.3
Stan	14	3	P	U	12	A	31	7
Stan	5	4	P	U	12	A	31	3
Stan	5	4	P	U	12	B	31	12
Stan	14	4	P	U	12	A	31	1
Stan	14	4	P	U	12	B	31	2
Stan	5	1	P	U	12	A	32	5
Stan	5	1	P	U	12	B	32	8
Stan	14	3	P	U	12	B	32	11		0.7	0.2	1	0.2
Stan	14	3	P	U	12	A	32	11
Stan	5	4	P	U	12	A	32	4
Stan	5	4	P	U	12	B	32	9
Stan	14	4	P	U	12	A	32	2
Stan	14	4	P	U	12	B	32	4
Stan	5	1	P	U	12	A	33	1
Stan	5	1	P	U	12	B	33	2
Stan	14	4	P	U	12	A	100	1		2.1	0.7
Stan	14	4	P	U	12	A	102	2		4.1	1.6
Stan	14	4	P	U	12	B	110	1	139964	1.1	0.6
Stan	14	3	P	U	12	B	300	1		1.2	0.5
Stan	5	4	P	U	12	B	300	1
Stan	5	1	P	U	12	A	301	1		2.3	0.6
Stan	5	1	P	U	12	B	301	1
Stan	5	4	P	U	12	B	301	1		2.6	0.8
Stan	5	1	P	U	12	A	304	1		0.8	0.2
Stan	5	4	P	U	12	A	306	12	139891	1.2	0.5	1.1	0.5	0.9	0.4
Stan	5	4	P	U	12	B	306	1		1.5	0.5
Stan	5	1	P	U	12	A	307	1		1	0.2
Stan	5	4	P	U	12	B	307	1
Stan	5	4	P	U	12	B	308	1
Stan	14	3	P	U	12	A	310	3	yes	1.1	0.4
Stan	5	4	P	U	12	A	310	12		0.9	0.3	0.8	0.2	0.8	0.4
Stan	14	3	P	U	12	A	311	1	yes
Stan	14	3	P	U	12	A	311	2	yes	1	0.3	1.1	0.4
Stan	5	4	P	U	12	A	311	3		1	0.2	1.3	0.2
Stan	5	1	P	U	12	B	312	4
Stan	14	3	P	U	12	B	312	1
Stan	5	4	P	U	12	A	312	6		1.6	0.6	1.7	0.3
Stan	5	4	P	U	12	B	312	9		2.1	0.6	1.7	0.7
Stan	5	4	P	U	12	A	316	7		1.1	0.3	1.2	0.2
Stan	5	1	P	U	12	A	323	1	139905	1.4	0.4
Stan	14	4	P	U	12	A	324	1	139907	0.9	0.2
Stan	14	3	P	U	12	B	400	1		1.4	0.3
Stan	14	3	P	U	12	B	401	2		2.2	0.5
Stan	14	3	P	U	12	B	402	3		1.2	0.4	1	0.4	0.9	0.4
Stan	5	1	P	U	12	B	403	1		0.8	0.2
Stan	5	4	P	U	12	A	405	1		1.1	0.3
Stan	5	1	P	U	12	A	407	1
Stan	14	3	P	U	12	A	407	2		1.1	0.3	0.7	0.3
Stan	5	4	P	U	12	A	407	2		0.9	0.3
Stan	14	4	P	U	12	B	407	2		1	0.5
Stan	5	4	P	U	12	A	410	1
Stan	14	3	P	U	12	A	411	1	yes	2.5	0.6
Stan	5	1	P	U	12	A	413	3
Stan	14	3	P	U	12	A	413	2	yes	0.7	0.1
Stan	14	3	P	U	12	B	413	1	yes	0.6	0.2
Stan	14	4	P	U	12	B	413	2		0.6	0.1
Stan	5	1	P	U	12	B	416	1
Stan	5	1	P	U	12	A	421	2		0.7	0.2
Stan	5	1	P	U	12	B	421	4		1	0.2
Stan	14	3	P	U	12	A	421	3	yes	0.6	0.1	0.6	0.2
Stan	5	4	P	U	12	B	421	2
Stan	14	4	P	U	12	B	425	1
Stan	14	3	P	U	12	A	426	1	yes	0.9	0.2
Stan	5	4	P	U	12	A	426	2		0.7	0.1
Stan	5	1	P	U	12	B	430	3		0.6	0.2
Stan	5	1	P	U	12	B	432	3
Stan	5	4	P	U	12	B	435	1		0.9	0.2																	top wing rounded with short frings
Stan	14	4	P	U	12	B	441	1	139965	0.7	0.1
Stan	14	4	P	U	12	B	452	1	139966	1.5	0.5
Stan	5	1	P	U	12	B	455	1	139914	0.8	0.2
Stan	14	3	P	U	12	B	500	1		5.2	3
Stan	14	4	P	U	12	A	500	2		5.5	2.7
Stan	14	3	P	U	12	B	501	1		2.4	0.9
Stan	5	4	P	U	12	B	501	1
Stan	14	4	P	U	12	A	501	3
Stan	14	4	P	U	12	B	501	1		2.3	0.7
Stan	14	3	P	U	12	B	502	10		1	0.3	1.3	0.5	1	0.4	0.7	0.3	1	0.5	0.8	0.5	1.6	0.9	1.1	0.6	1.6	0.8
Stan	14	4	P	U	12	A	502	1
Stan	5	1	P	U	12	A	503	2
Stan	5	1	P	U	12	B	503	2
Stan	5	4	P	U	12	B	503	1
Stan	14	4	P	U	12	A	503	1
Stan	14	3	P	U	12	A	504	1
Stan	5	4	P	U	12	A	506	1		2.5	0.7																	nymph with wings developing, dark body
Stan	14	3	P	U	12	B	507	1		1.7	0.6
Stan	5	4	P	U	12	A	507	6		1.8	0.5	2.3	1
Stan	5	1	P	U	12	A	508	5
Stan	5	1	P	U	12	B	508	6
Stan	5	4	P	U	12	B	508	1
Stan	14	4	P	U	12	B	508	2		1.4	0.3
Stan	5	1	P	U	12	A	509	1																				nymph - wings still developing
Stan	14	4	P	U	12	A	509	1		2.2	0.8
Stan	5	1	P	U	12	A	510	1
Stan	14	3	P	U	12	A	510	4		3.1	0.9	4.3	1
Stan	14	4	P	U	12	A	510	2		4.4	1.1
Stan	14	4	P	U	12	B	510	2		3.3	0.9
Stan	5	1	P	U	12	A	512	1
Stan	5	1	P	U	12	B	512	1
Stan	14	3	P	U	12	A	512	2		3	0.8	3.1	0.9
Stan	5	1	P	U	12	B	515	2
Stan	14	3	P	U	12	B	515	3		0.6	0.2
Stan	5	4	P	U	12	A	515	1		0.7	0.3
Stan	5	4	P	U	12	B	515	2
Stan	14	3	P	U	12	B	517	4	yes	0.4	0.2	0.4	0.2	0.5	0.3
Stan	5	4	P	U	12	B	517	1
Stan	5	1	P	U	12	B	521	1
Stan	14	4	P	U	12	A	527	1
Stan	5	1	P	U	12	B	529	1
Stan	5	1	P	U	12	B	499	1
Stan	5	1	P	U	12	A	600	3
Stan	5	1	P	U	12	B	600	1
Stan	14	3	P	U	12	B	600	7		2.2	1.3
Stan	14	3	P	U	12	A	600	5		0.4	0.3
Stan	5	4	P	U	12	B	600	1
Stan	14	4	P	U	12	A	600	5
Stan	14	4	P	U	12	B	600	7		0.4	0.2	0.6	0.2
Stan	14	3	P	U	12	B	601	23	yes	1	0.7	0.4	0.3	0.6	0.5													most tiny and left in extra; about the size of springtails or pollen grains
Stan	14	3	P	U	12	A	601	8		0.7	0.5	0.7	0.5	1	0.6
Stan	5	1	P	U	12	A	602	2
Stan	5	1	P	U	12	B	602	2		1.3	0.7
Stan	14	3	P	U	12	B	602	12		0.4	0.3	1.3	0.7	0.7	0.5
Stan	14	3	P	U	12	A	602	2	yes	0.7	0.3
Stan	14	4	P	U	12	A	602	4
Stan	14	4	P	U	12	B	602	8
Stan	5	1	P	U	12	A	603	1
Stan	14	3	P	U	12	B	603	4	yes	0.7	0.45	0.6	0.5	0.9	0.4
Stan	14	3	P	U	12	A	603	1	yes		0.5
Stan	5	1	P	U	12	B	605	1		0.8	0.3
Stan	5	1	P	U	12	A	607	1
Stan	5	1	P	U	12	B	607	1		0.7	0.5
Stan	5	4	P	U	12	B	607	3
Stan	14	4	P	U	12	B	608	1		1.1	0.8
Stan	5	1	P	U	12	B	609	1		1.9	0.6
Stan	14	4	P	U	12	B	609	1		2	0.5
Stan	14	3	P	U	12	B	700	4		2.3	0.5	0.8	0.2
Stan	14	3	P	U	12	A	700	1		1.8	0.3
Stan	14	3	P	U	12	A	700	4	yes	2.7	0.7	1.1	0.4	0.7	0.2
Stan	14	4	P	U	12	B	700	3		7.7	0.7
Stan	5	1	P	U	12	B	701	1		6.8	1.7
Stan	14	3	P	U	12	B	701	1		3.5	1.1
Stan	14	3	P	U	12	A	701	1		6	1.3
Stan	14	3	P	U	12	B	702	1		1.6	1.2
Stan	14	3	P	U	12	B	703	2		1.1	0.6	1	0.3
Stan	14	3	P	U	12	B	704	2		3	2.1	3	2.2
Stan	14	4	P	U	12	B	704	1		4.7	2.9
Stan	14	3	P	U	12	A	705	1		3.5	1.4
Stan	5	4	P	U	12	B	705	1		3.1	1.1
Stan	14	4	P	U	12	A	705	5		3.9	1.7	5.6	1.1
Stan	14	4	P	U	12	B	705	5		3.2	1.1	3.3	1.3
Stan	14	3	P	U	12	A	707	1		6	0.8
Stan	14	4	P	U	12	B	707	1
Stan	14	3	P	U	12	A	708	3		2.9	0.4	3.6	0.7
Stan	14	4	P	U	12	B	708	1		2.9	0.7
Stan	14	3	P	U	12	A	709	1		4.5	0.5
Stan	14	3	P	U	12	A	710	1		2.2	1.8
Stan	5	4	P	U	12	A	710	2		2.1	1.6																	4 antennal segments, last one slightly clubbd like 731
Stan	14	3	P	U	12	A	711	2		2.1	0.9
Stan	14	3	P	U	12	A	712	1		2.8	0.9
Stan	14	4	P	U	12	B	712	1
Stan	5	1	P	U	12	A	713	1		7.4	1.4
Stan	14	3	P	U	12	A	713	1		5.3	1.2
Stan	5	4	P	U	12	A	713	1		7.1	1.2
Stan	5	1	P	U	12	B	714	1
Stan	5	4	P	U	12	A	714	1		6.7	2.6
Stan	14	4	P	U	12	B	714	1		3.4	1.4
Stan	14	3	P	U	12	A	716	1		1.2	0.3
Stan	14	3	P	U	12	B	716	3		0.6	0.2	0.5	0.2	0.7	0.2
Stan	14	3	P	U	12	B	718	1	yes	1.6	0.4
Stan	14	4	P	U	12	B	720	3
Stan	5	4	P	U	12	A	727	1	139892	6	1.9
Stan	14	4	P	U	12	B	728	1
Stan	5	4	P	U	12	A	731	1	139893	6.8	4.3
Stan	14	4	P	U	12	B	739	1	139968	6.6	1.3
Stan	14	3	P	U	12	B	800	1	yes	1.1	0.7
Stan	14	3	P	U	12	B	801	1		1.1	0.7
Stan	14	4	P	U	12	B	801	6		1	0.4
Stan	14	4	P	U	12	B	802	1
Stan	14	3	P	U	12	A	803	2	yes	1.2	0.3	1.2	0.4
Stan	14	3	P	U	12	B	803	1
Stan	14	4	P	U	12	B	803	1
Stan	14	3	P	U	12	A	805	7	yes	0.6	0.3	0.6	0.4	0.6	0.4
Stan	14	3	P	U	12	B	805	1
Stan	14	4	P	U	12	B	805	8
Stan	14	3	P	U	12	A	806	1	yes	1	0.6
Stan	5	4	P	U	12	A	806	2		1	0.5	0.9	0.5
Stan	14	3	P	U	12	B	807	1	yes	1.1	0.6
Stan	5	1	P	U	12	B	810	1
Stan	5	4	P	U	12	A	810	2		0.7	0.4	0.6	0.4
Stan	5	4	P	U	12	B	810	53		0.6	0.3	0.5	0.3	0.5	0.4
Stan	5	1	P	U	12	A	900	1																				not actually found in vial, but on original summer 2009 sheet
Stan	14	3	P	U	12	B	900	4		0.8	0.4	1.2	0.5	0.9	0.4	0.3	0.6
Stan	14	3	P	U	12	A	900	1	yes	0.7	0.4
Stan	5	4	P	U	12	B	900	1
Stan	14	4	P	U	12	B	900	1	139967	0.5	0.3
Stan	5	1	P	U	12	A	901	2
Stan	5	1	P	U	12	B	901	5
Stan	14	3	P	U	12	A	901	4	yes	0.3	0.2
Stan	14	3	P	U	12	B	901	3		0.3	0.2
Stan	5	4	P	U	12	A	901	7
Stan	5	4	P	U	12	B	901	2
Stan	14	4	P	U	12	A	901	5
Stan	14	4	P	U	12	B	901	11
Stan	5	1	P	U	12	B	902	1		0.8	0.5
Stan	14	3	P	U	12	B	902	2		0.4	0.4	0.6	0.3
Stan	14	3	P	U	12	A	903	2	yes	0.5	0.3	0.6	0.3
Stan	14	3	P	U	12	A	904	1	yes	0.5	0.3
Stan	14	4	P	U	12	B	904	1
Stan	14	3	P	U	12	A	905	1	yes	0.5	0.2
Stan	14	4	P	U	12	A	905	2
Stan	14	4	P	U	12	A	906	1
Stan	5	1	P	U	12	A	907	39
Stan	5	1	P	U	12	B	907	38
Stan	5	4	P	U	12	A	907	50	139894
Stan	5	4	P	U	12	B	907	2
Stan	5	4	P	U	12	B	907	17
Stan	5	1	P	U	12	A	910	2
Stan	5	4	P	U	12	A	910	4	138895
Stan	14	4	P	U	12	B	910	3
Stan	14	4	P	U	12	B	911	2
Stan	14	4	P	U	12	B	912	2		0.9	0.4
Stan	14	4	P	U	12	A	950	1
Stan	14	4	P	U	12	B	950	3
Stan	5	1	P	U	12	A	951	49
Stan	5	1	P	U	12	B	951	60
Stan	14	3	P	U	12	A	951	7	yes	0.7	0.3
Stan	14	3	P	U	12	B	951	3		0.5	0.2
Stan	5	4	P	U	12	A	951	3
Stan	5	4	P	U	12	B	951	6
Stan	14	4	P	U	12	A	951	1
Stan	14	4	P	U	12	B	951	7
Stan	14	3	P	U	12	A	952	1	yes	0.6	0.3
Stan	14	3	P	U	12	A	953	1	yes	0.8	0.3
Stan	14	3	P	U	12	A	954	2	yes	1.2	0.3	0.8	0.4
Stan	5	1	P	U	12	A	955	2
Stan	5	1	P	U	12	B	955	2
Stan	5	4	P	U	12	B	955	4
Stan	5	1	P	U	12	B	957	3
Stan	5	4	P	U	12	A	957	6
Stan	5	4	P	U	12	B	957	1		0.2	0.1
Stan	14	4	P	U	12	B	957	1		0.9	0.4
Stan	5	1	P	U	12	B	958	9
Stan	5	4	P	U	12	B	958	5
Stan	5	1	P	U	12	A	964	1	139904	3.1	0.5
Stan	5	1	P	U	12	B	965	1	139913	3	0.6
Stan	5	1	P	U	12	B	406-2	1		0.8	0.3
Stan	14	3	P	U	12	A	406-2	5	yes	0.9	0.3	1.2	0.3
Stan	14	3	P	U	12	A	406-3	1	yes	1.7	0.5
Stan	5	1	P	U	12	B	421-2	2		0.8	0.2
Stan	5	1	P	G	7	A	10	1	139896	8.5	2.7
Stan	5	1	P	G	7	A	30	14
Stan	5	1	P	G	7	B	30	7
Stan	5	1	P	G	7	A	31	15
Stan	5	1	P	G	7	B	31	12
Stan	5	1	P	G	7	A	32	5
Stan	5	1	P	G	7	B	32	3
Stan	5	1	P	G	7	B	106	1		1.8	0.9
Stan	5	1	P	G	7	B	301	3		1.4	0.6
Stan	5	1	P	G	7	B	306	1		1.3	0.5
Stan	5	1	P	G	7	B	309	1		1.9	0.6
Stan	5	1	P	G	7	B	312	2
Stan	5	1	P	G	7	B	320	1		3.8	1
Stan	5	1	P	G	7	B	321	1		0.8	0.3
Stan	5	1	P	G	7	B	321	1	139937	0.6	0.2
Stan	5	1	P	G	7	A	403	1
Stan	5	1	P	G	7	B	403	2
Stan	5	1	P	G	7	B	410	3
Stan	5	1	P	G	7	B	413	1
Stan	5	1	P	G	7	A	415	1
Stan	5	1	P	G	7	B	415	1	139934	3.6	0.7
Stan	5	1	P	G	7	A	416	1		0.7	0.2
Stan	5	1	P	G	7	A	421	1
Stan	5	1	P	G	7	A	425	3	139899	0.9	0.3	0.7	0.2
Stan	5	1	P	G	7	B	426	2		0.9	0.1	1	0.1
Stan	5	1	P	G	7	A	429	1		1.2	0.4
Stan	5	1	P	G	7	B	429	2
Stan	5	1	P	G	7	B	429	1
Stan	5	1	P	G	7	A	430	1		0.5	0.1
Stan	5	1	P	G	7	B	430	2
Stan	5	1	P	G	7	B	458	1	139935	0.8	0.2
Stan	5	1	P	G	7	A	501	4		2.7	1.1	2.5	0.9
Stan	5	1	P	G	7	B	501	1
Stan	5	1	P	G	7	B	502	1
Stan	5	1	P	G	7	A	503	6		2	0.5	2.6	0.6
Stan	5	1	P	G	7	B	503	4
Stan	5	1	P	G	7	A	504	3
Stan	5	1	P	G	7	B	505	1	139931	2.5	0.8
Stan	5	1	P	G	7	A	507	5		2.8	1	2.4	0.7
Stan	5	1	P	G	7	B	507	3
Stan	5	1	P	G	7	A	508	6		1.5	0.3	1.3	0.3	2.2	0.5
Stan	5	1	P	G	7	B	508	13	139932	2	0.5
Stan	5	1	P	G	7	A	510	1	139897	3.3	0.9
Stan	5	1	P	G	7	B	510	1
Stan	5	1	P	G	7	B	512	1
Stan	5	1	P	G	7	A	515	3		1.5	0.6	2.2	0.9
Stan	5	1	P	G	7	B	515	8
Stan	5	1	P	G	7	B	529	1
Stan	5	1	P	G	7	A	600	4
Stan	5	1	P	G	7	B	600	1
Stan	5	1	P	G	7	A	601	6
Stan	5	1	P	G	7	B	601	2
Stan	5	1	P	G	7	A	602	2
Stan	5	1	P	G	7	A	603	1
Stan	5	1	P	G	7	A	606	1
Stan	5	1	P	G	7	A	703	1
Stan	5	1	P	G	7	B	703	2		0.9	0.7
Stan	5	1	P	G	7	A	704	2		2.9	1.8
Stan	5	1	P	G	7	A	706	1	139898	1.2	0.5
Stan	5	1	P	G	7	B	713	1		7.7	1.8
Stan	5	1	P	G	7	B	718	4		1.1	0.3
Stan	5	1	P	G	7	A	801	2		0.7	0.6
Stan	5	1	P	G	7	A	803	6		1.4	0.5	0.9	0.7
Stan	5	1	P	G	7	B	803	1
Stan	5	1	P	G	7	A	805	3
Stan	5	1	P	G	7	A	810	4		0.6	0.3
Stan	5	1	P	G	7	A	901	23
Stan	5	1	P	G	7	B	901	20
Stan	5	1	P	G	7	A	902	1
Stan	5	1	P	G	7	A	905	14		0.2	0.1	0.5	0.3
Stan	5	1	P	G	7	B	905	4	139936	0.5	0.2
Stan	5	1	P	G	7	A	907	1
Stan	5	1	P	G	7	B	908	1
Stan	5	1	P	G	7	A	911	1
Stan	5	1	P	G	7	A	951	20
Stan	5	1	P	G	7	B	951	13
Stan	5	1	P	G	7	B	955	1
Stan	5	1	P	G	7	A	958	3
Stan	5	1	P	G	7	B	958	6
Stan	5	1	P	G	7	B	969	1	139933	1.2	0.4
Stan	5	1	P	G	7	B	421-2	1
Stan	5	1	P	G	7	A	1	1073
Stan	5	1	P	G	7	B	1	352
Stan	14	3	P	G	7	A	1	25
Stan	14	3	P	G	7	B	1	54
Stan	5	4	P	G	7	B	1	95
Stan	5	4	P	G	7	A	1	84
Stan	14	4	P	G	7	A	1	348	139909	0.4	0.2																	the one saved looked different -- black and white face -- but because I haven't' been careful I didn't want to call it something different
Stan	14	4	P	G	7	B	1	385		0.2	0.1	0.3	0.1	0.3	0.1
Stan	14	3	P	G	7	A	10	1		5.5	1.7
Stan	14	3	P	G	7	B	10	2		5.5	2	4.4	1.5
Stan	5	4	P	G	7	B	10	1		5.4	1.8
Stan	14	4	P	G	7	A	10	2		6.3	0.9	9.2	1.2
Stan	14	4	P	G	7	B	10	2		7.7	2.7	6.2	2.2
Stan	14	3	P	G	7	A	30	2
Stan	14	3	P	G	7	B	30	6
Stan	5	4	P	G	7	B	30	3
Stan	14	4	P	G	7	B	30	1		1	0.2
Stan	14	3	P	G	7	A	31	4
Stan	14	3	P	G	7	B	31	3
Stan	5	4	P	G	7	B	31	6
Stan	5	4	P	G	7	A	31	4
Stan	14	4	P	G	7	A	31	1
Stan	14	3	P	G	7	A	32	23
Stan	14	3	P	G	7	B	32	73
Stan	5	4	P	G	7	B	32	2
Stan	5	4	P	G	7	A	32	4
Stan	14	4	P	G	7	A	32	8
Stan	14	4	P	G	7	A	33	1
Stan	5	4	P	G	7	B	101	2		1.5	0.7
Stan	14	4	P	G	7	A	102	2		4.1	1.4
Stan	14	4	P	G	7	B	102	1		4.8	1.6
Stan	5	4	P	G	7	B	105	1		5.6	3.3
Stan	14	3	P	G	7	A	300	1	yes	1.5	0.6
Stan	14	3	P	G	7	B	300	1	yes replacing one from S143PG7A that fell off	1	0.3
Stan	14	3	P	G	7	B	302	1	yes	4.5	1.5
Stan	14	3	P	G	7	A	303	1
Stan	14	3	P	G	7	A	306	1	yes	1.2	0.4
Stan	14	4	P	G	7	B	306	1
Stan	14	3	P	G	7	A	307	1	yes	1.4	0.4
Stan	14	3	P	G	7	B	307	1
Stan	14	3	P	G	7	A	308	2	yes		0.8
Stan	14	3	P	G	7	A	309	1	yes	0.9	0.4
Stan	5	4	P	G	7	A	309	1
Stan	5	4	P	G	7	A	312	1
Stan	14	3	P	G	7	A	400	1
Stan	14	3	P	G	7	A	401	1		2.4	0.5
Stan	14	3	P	G	7	A	407	1	yes	1	0.3
Stan	14	3	P	G	7	B	407	3		0.9	0.3	0.9	0.3
Stan	5	4	P	G	7	B	407	1
Stan	14	4	P	G	7	A	407	1		0.9	0.4
Stan	14	3	P	G	7	A	418	2	yes	0.9	0.3
Stan	14	3	P	G	7	A	419	1	yes	0.6	0.2
Stan	14	3	P	G	7	A	420	1	yes
Stan	14	3	P	G	7	A	421	2	yes	0.6	0.2
Stan	14	3	P	G	7	B	421	1	yes	0.7	0.2
Stan	14	4	P	G	7	A	421	1		0.7	0.2
Stan	14	3	P	G	7	B	423	1	yes	0.9	0.3
Stan	14	3	P	G	7	B	424	1	yes	0.6	0.2
Stan	5	4	P	G	7	A	429	2
Stan	5	4	P	G	7	B	432	1
Stan	5	4	P	G	7	B	448	1	139867	1.9	0.4
Stan	5	4	P	G	7	B	449	1	139868	1.1	0.2
Stan	14	4	P	G	7	A	454	1	139908	1.7	0.7
Stan	5	4	P	G	7	A	461	1
Stan	14	4	P	G	7	B	469	1	140027	3.6	0.7
Stan	14	3	P	G	7	A	500	1
Stan	14	3	P	G	7	A	501	4	yes	2.8	0.9	2.3	0.9
Stan	14	3	P	G	7	B	501	17		1.6	0.6	1.7	0.6	1.5	0.6
Stan	5	4	P	G	7	B	501	6
Stan	5	4	P	G	7	A	501	2
Stan	14	4	P	G	7	A	501	10
Stan	14	4	P	G	7	B	501	10
Stan	14	3	P	G	7	A	502	2	yes	1.9	0.8
Stan	14	3	P	G	7	B	502	3		1.9	0.7	0.8	0.3
Stan	5	4	P	G	7	B	502	4		0.6	0.3	0.8	0.5
Stan	14	4	P	G	7	A	502	2
Stan	14	4	P	G	7	B	502	6		2	0.9	1.5	0.7
Stan	5	4	P	G	7	B	504	2		0.6	0.2
Stan	5	4	P	G	7	B	507	2
Stan	5	4	P	G	7	A	507	2
Stan	14	3	P	G	7	A	508	3
Stan	14	3	P	G	7	B	508	1		1.9	0.4
Stan	5	4	P	G	7	B	508	1		1.9	0.4
Stan	5	4	P	G	7	A	508	1
Stan	14	4	P	G	7	A	508	1
Stan	14	4	P	G	7	B	509	1	140030	1.7	0.7
Stan	14	3	P	G	7	A	510	2		4.2	1.1	2.5	0.7
Stan	14	3	P	G	7	B	510	2		3.3	0.8
Stan	5	4	P	G	7	A	510	2
Stan	14	3	P	G	7	A	511	1
Stan	14	3	P	G	7	B	512	1	yes
Stan	5	4	P	G	7	A	512	2
Stan	14	4	P	G	7	A	512	1		2.5	0.7
Stan	14	4	P	G	7	B	512	3
Stan	5	4	P	G	7	B	524	1		2.7	0.9
Stan	5	4	P	G	7	A	524	1		2.1	1
Stan	5	4	P	G	7	B	527	1		2.4	0.6
Stan	14	4	P	G	7	B	533	1	140026	1.2	0.6
Stan	14	3	P	G	7	A	600	10	yes	1.1	0.5	0.7	0.4
Stan	14	3	P	G	7	B	600	12		1	0.5	0.4	0.4
Stan	5	4	P	G	7	B	600	11
Stan	5	4	P	G	7	A	600	8
Stan	14	4	P	G	7	A	600	7
Stan	14	4	P	G	7	B	600	5		0.8	0.4
Stan	14	3	P	G	7	A	601	1		1.1	0.5
Stan	5	4	P	G	7	B	601	1
Stan	14	3	P	G	7	A	602	5	yes	1.5	0.7
Stan	14	3	P	G	7	B	602	13
Stan	5	4	P	G	7	B	602	9
Stan	5	4	P	G	7	A	602	14
Stan	14	4	P	G	7	A	602	13
Stan	14	4	P	G	7	B	602	10		1	0.5	0.2	0.2
Stan	14	3	P	G	7	B	603	1
Stan	5	4	P	G	7	B	603	1
Stan	14	3	P	G	7	A	604	1	yes	1.4	0.8
Stan	14	3	P	G	7	A	605	4	yes	0.7	0.3
Stan	14	3	P	G	7	B	605	1
Stan	5	4	P	G	7	B	605	2
Stan	14	4	P	G	7	A	605	1
Stan	14	3	P	G	7	A	700	3
Stan	14	4	P	G	7	A	701	1
Stan	14	3	P	G	7	A	705	2		3.5	1.2
Stan	5	4	P	G	7	B	705	2
Stan	5	4	P	G	7	A	705	2
Stan	14	4	P	G	7	A	705	2
Stan	14	3	P	G	7	A	706	2
Stan	5	4	P	G	7	A	707	1
Stan	14	4	P	G	7	A	707	1		8.5	0.4
Stan	14	4	P	G	7	B	707	1		8.4	0.6
Stan	14	3	P	G	7	B	708	1	yes	3.6	1.4
Stan	14	4	P	G	7	A	708	2
Stan	14	4	P	G	7	B	708	3		3.8	0.9	2.8	0.8
Stan	14	4	P	G	7	B	711	1	140029	2.3	1.1
Stan	14	3	P	G	7	A	712	1		6	2
Stan	14	3	P	G	7	A	714	1	yes	5.4	2
Stan	14	3	P	G	7	B	715	2	yes	3.5	1.5
Stan	14	3	P	G	7	B	716	1	yes	1.1	0.2
Stan	5	4	P	G	7	B	717	1		9	5.1
Stan	5	4	P	G	7	B	718	1
Stan	14	4	P	G	7	B	718	1		5	1
Stan	14	4	P	G	7	B	719	3	140028	2.9	0.2	3.2	0.7	3.1	0.3
Stan	5	4	P	G	7	A	720	2		2.5	1.7	4	3.4
Stan	5	4	P	G	7	B	729	1	139865	7.6	2.4
Stan	14	4	P	G	7	A	730	1		2.7	0.7
Stan	14	4	P	G	7	B	732	5		2.3	0.2
Stan	5	4	P	G	7	A	736	2	139976	5	3.9	5.6	3.4
Stan	14	4	P	G	7	A	801	1		0.8	0.5
Stan	14	3	P	G	7	A	803	7
Stan	14	3	P	G	7	B	803	1			0.5
Stan	5	4	P	G	7	B	803	2		0.8	0.5
Stan	5	4	P	G	7	A	803	1
Stan	14	4	P	G	7	A	803	2
Stan	14	4	P	G	7	A	805	1
Stan	5	4	P	G	7	A	810	1
Stan	5	4	P	G	7	B	812	1	139866	5.6	1.5
Stan	14	3	P	G	7	A	901	2	yes	1.6	0.7
Stan	14	3	P	G	7	B	901	1
Stan	5	4	P	G	7	B	901	15
Stan	5	4	P	G	7	A	901	15
Stan	14	4	P	G	7	A	901	8
Stan	14	4	P	G	7	B	901	5
Stan	14	3	P	G	7	B	902	1
Stan	5	4	P	G	7	A	907	1
Stan	5	4	P	G	7	B	910	1
Stan	14	3	P	G	7	B	951	4
Stan	5	4	P	G	7	B	951	8
Stan	5	4	P	G	7	A	951	6
Stan	14	4	P	G	7	B	951	1
Stan	14	3	P	G	7	B	952	2	yes	0.6	0.4
Stan	14	4	P	G	7	B	952	1
Stan	14	4	P	G	7	B	955	1
Stan	5	4	P	G	7	A	957	1
Stan	5	4	P	G	7	B	962	1		2	0.3
Stan	14	4	P	G	7	A	406-2	1		1.6	0.3
Stan	14	3	P	G	7	A	4xx	1																				only thorax present. Wings with stigma only, fringe. Abdomen .8 x .4. 20100615_0027.JPG, _0028
Stan	14	3	P	G	7	B	4xy	1																				thorax and one hind wing. Thin with fringe on under-surface- no veins - small tibial spur - small hairs down tibia and tarsae
Stan	5	1	P	G	4	A	1	834
Stan	5	1	P	G	4	B	1	430
Stan	14	3	P	G	4	A	1	39
Stan	14	3	P	G	4	B	1	152
Stan	5	4	P	G	4	A	1	271
Stan	5	4	P	G	4	B	1	138
Stan	14	4	P	G	4	A	1	220
Stan	14	4	P	G	4	B	1	275
Stan	5	1	P	G	4	A	10	1		7.5	2.5
Stan	5	4	P	G	4	A	10	1		6	1.2
Stan	5	1	P	G	4	A	30	5
Stan	5	1	P	G	4	B	30	4
Stan	5	4	P	G	4	A	30	7
Stan	5	4	P	G	4	B	30	1
Stan	5	1	P	G	4	A	31	15
Stan	5	1	P	G	4	B	31	3
Stan	14	3	P	G	4	A	31	1
Stan	14	3	P	G	4	B	31	8
Stan	5	4	P	G	4	A	31	2
Stan	5	4	P	G	4	B	31	2
Stan	14	4	P	G	4	A	31	2
Stan	5	1	P	G	4	B	32	4
Stan	14	3	P	G	4	A	32	9
Stan	14	3	P	G	4	B	32	36
Stan	5	4	P	G	4	A	32	7
Stan	5	4	P	G	4	B	32	3
Stan	14	4	P	G	4	A	32	3
Stan	14	4	P	G	4	B	32	3
Stan	14	3	P	G	4	B	33	1
Stan	14	4	P	G	4	B	100	2		3.8	1.5	3.8	1.2
Stan	5	1	P	G	4	B	101	1		0.9	0.5
Stan	14	4	P	G	4	B	102	2		3.3	1.4	3.6	1.3
Stan	14	4	P	G	4	B	105	2																				pupae
Stan	14	3	P	G	4	B	111	1	140016	2.1	1.3
Stan	5	1	P	G	4	B	300	1		1.2	0.5
Stan	14	3	P	G	4	A	300	2	139917	1.2	0.5
Stan	14	3	P	G	4	B	300	1
Stan	14	4	P	G	4	A	300	1
Stan	14	3	P	G	4	A	301	1
Stan	14	3	P	G	4	B	301	2
Stan	5	4	P	G	4	A	301	1		2.3	0.4
Stan	5	4	P	G	4	B	301	1		1.5	0.7
Stan	5	4	P	G	4	A	304	3	139825	1.6	0.5	1.5	0.5
Stan	5	4	P	G	4	B	307	1		1	0.2
Stan	14	3	P	G	4	A	309	2																				wing veins the same, abdomen without blood
Stan	5	4	P	G	4	A	309	1		1.7	0.4
Stan	5	4	P	G	4	B	309	2		1.5	0.5
Stan	14	3	P	G	4	B	311	3	140014	1.1	0.2
Stan	14	4	P	G	4	B	311	1
Stan	5	4	P	G	4	B	312	4
Stan	14	3	P	G	4	A	314	5	139918 139919	1.6	0.6	1.1	0.5	0.9	0.4
Stan	14	3	P	G	4	B	314	1
Stan	5	4	P	G	4	B	317	1
Stan	5	4	P	G	4	A	319	2	139826	1.2	0.1	1.2	0.3
Stan	14	3	P	G	4	B	320	1	140015	3.5	0.6
Stan	5	4	P	G	4	B	320	1	139869	4	1
Stan	14	3	P	G	4	B	321	4
Stan	5	1	P	G	4	B	323	1
Stan	5	1	P	G	4	B	403	1	139925	0.8	0.1
Stan	5	1	P	G	4	A	407	2		0.7	0.1
Stan	14	3	P	G	4	A	407	1
Stan	5	4	P	G	4	B	407	1		1	0.2
Stan	5	1	P	G	4	A	409	3		1.1	0.4	0.7	0.3
Stan	14	3	P	G	4	B	409	1	140013	1	0.3
Stan	5	4	P	G	4	A	409	2	139827	0.7	0.2
Stan	5	1	P	G	4	A	410	4		0.6	0.1
Stan	5	1	P	G	4	B	410	1
Stan	5	4	P	G	4	B	410	1		0.7	0.1
Stan	5	4	P	G	4	A	413	1
Stan	5	1	P	G	4	A	414	1	139902	1.5	0.4
Stan	14	3	P	G	4	A	420	1	139920	0.7	0.2
Stan	5	1	P	G	4	A	421	1		0.6	0.1
Stan	14	4	P	G	4	A	421	1
Stan	5	1	P	G	4	A	425	1		0.9	0.2
Stan	5	1	P	G	4	B	425	2		0.9	0.3	0.8	0.3
Stan	14	3	P	G	4	A	425	2		0.9	0.4	0.9	0.3
Stan	14	3	P	G	4	B	425	3		1	0.3	0.7	0.3
Stan	5	1	P	G	4	B	429	2	139924	0.6	0.2	1	0.3															these looked a little different next to each other, but I think they'd be ID'd to the same thing if they were independent.
Stan	14	3	P	G	4	A	429	1
Stan	5	4	P	G	4	A	429	1	139829	1.1	0.3
Stan	14	4	P	G	4	B	429	1
Stan	5	1	P	G	4	A	432	3		0.4	0.1
Stan	5	1	P	G	4	B	432	1		0.4	0.1
Stan	14	3	P	G	4	B	432	2
Stan	5	4	P	G	4	A	432	1		0.4	0.1
Stan	5	4	P	G	4	B	432	2		0.6	0.1
Stan	5	4	P	G	4	A	434	1		0.6	0.2
Stan	5	1	P	G	4	B	436	3		0.7	0.2	0.5	0.1
Stan	5	4	P	G	4	B	436	1	139870	0.6	0.1
Stan	5	1	P	G	4	B	439	1		2.2	0.6
Stan	14	3	P	G	4	B	441	1		0.4	0.1
Stan	5	4	P	G	4	A	441	1	139828	0.6	0.1
Stan	5	4	P	G	4	A	442	1	139830	0.5	0.1
Stan	5	4	P	G	4	A	443	2	139834 139835	0.6	0.1	0.4	0.1
Stan	5	1	P	G	4	A	449	1		1.1	0.2
Stan	5	4	P	G	4	B	449	1		1.2	0.2
Stan	5	1	P	G	4	A	452	1	139903	1.9	0.5
Stan	14	3	P	G	4	B	464	2	140011 140012	0.5	0.1	0.6	0.1
Stan	14	3	P	G	4	B	465	20	140009 140010	1.1	0.4	0.8	0.3	1.1	0.4
Stan	14	4	P	G	4	B	468	2	139986 139989	0.9	0.3	1.2	0.3
Stan	5	1	P	G	4	A	499	1	139901		0.2																	abdomen missing
Stan	14	3	P	G	4	A	501	4		2.4	1.1
Stan	14	3	P	G	4	B	501	3		2.3	0.9	2.7	1
Stan	5	4	P	G	4	A	501	1
Stan	5	4	P	G	4	B	501	2		2.4	0.8
Stan	14	4	P	G	4	A	501	10		2.3	0.6	2.6	0.6
Stan	14	4	P	G	4	B	501	11
Stan	5	1	P	G	4	A	502	1
Stan	14	3	P	G	4	B	502	1		2.2	0.6
Stan	5	4	P	G	4	A	502	2
Stan	5	4	P	G	4	B	502	2
Stan	14	4	P	G	4	A	502	5		1.9	0.7
Stan	14	4	P	G	4	B	502	8
Stan	5	1	P	G	4	A	503	9		2.1	0.6	2.6	0.6
Stan	5	1	P	G	4	B	503	1		2.3	0.5
Stan	14	3	P	G	4	A	503	4		2.4	0.6
Stan	14	4	P	G	4	B	503	1
Stan	5	1	P	G	4	A	504	2
Stan	14	3	P	G	4	A	504	1
Stan	5	4	P	G	4	B	504	1		0.5	0.2
Stan	14	3	P	G	4	B	505	1
Stan	5	1	P	G	4	A	507	4
Stan	5	1	P	G	4	B	507	4		3	1.1
Stan	5	1	P	G	4	A	508	12
Stan	5	1	P	G	4	B	508	14		2	0.4
Stan	14	3	P	G	4	A	508	1		1.1	0.3
Stan	14	3	P	G	4	A	508	4		0.7	0.2
Stan	14	3	P	G	4	B	508	10		2.2	0.4	1.2	0.3
Stan	5	4	P	G	4	A	508	1		2.1	0.3
Stan	5	4	P	G	4	B	508	1
Stan	14	4	P	G	4	B	508	1		1.6	0.4
Stan	14	3	P	G	4	A	510	2		2.7	0.6	4.1	1.1
Stan	5	4	P	G	4	A	510	2		4.3	1.2	2.2	0.4
Stan	14	4	P	G	4	A	510	1		3.8	1
Stan	5	1	P	G	4	A	512	2		2.5	0.9
Stan	5	1	P	G	4	B	512	1		2.3	0.8
Stan	5	4	P	G	4	A	512	2	139823	2.5	0.9
Stan	14	4	P	G	4	B	512	1
Stan	5	1	P	G	4	A	515	1
Stan	5	1	P	G	4	B	515	2		1.1	0.3
Stan	14	3	P	G	4	A	515	3		0.7	0.4	0.4	0.2
Stan	14	3	P	G	4	A	515	1		0.6	0.2
Stan	14	3	P	G	4	B	515	2		0.6	0.2	0.9	0.3
Stan	5	4	P	G	4	A	515	6
Stan	14	3	P	G	4	B	517	1
Stan	5	4	P	G	4	A	517	2		0.6	0.2
Stan	14	4	P	G	4	A	517	2		0.7	0.3	0.5	0.3
Stan	14	3	P	G	4	B	520	1		2.3	0.7
Stan	5	1	P	G	4	A	529	5		4.3	1	4.6	1.3
Stan	14	3	P	G	4	B	529	4		4.3	0.7	4.5	1
Stan	5	1	P	G	4	A	600	4
Stan	14	3	P	G	4	B	600	14
Stan	5	4	P	G	4	A	600	1	139822	0.7	0.3
Stan	5	4	P	G	4	B	600	4
Stan	14	4	P	G	4	A	600	12
Stan	14	4	P	G	4	B	600	5		0.6	0.4
Stan	14	3	P	G	4	A	601	4
Stan	14	3	P	G	4	B	601	2
Stan	5	1	P	G	4	A	602	11
Stan	14	3	P	G	4	A	602	3
Stan	14	3	P	G	4	B	602	14
Stan	5	4	P	G	4	B	602	1
Stan	14	4	P	G	4	A	602	24
Stan	14	4	P	G	4	B	602	32		0.7	0.5	0.5	0.2	0.3	0.2
Stan	5	4	P	G	4	B	603	3
Stan	14	4	P	G	4	A	603	3
Stan	5	1	P	G	4	B	605	1
Stan	14	3	P	G	4	A	605	4		0.8	0.2
Stan	14	3	P	G	4	B	605	11
Stan	5	1	P	G	4	A	606	1
Stan	5	1	P	G	4	A	607	2		0.6	0.4
Stan	14	3	P	G	4	B	607	1
Stan	14	3	P	G	4	B	608	1
Stan	14	4	P	G	4	A	609	1		1.6	0.4
Stan	14	3	P	G	4	A	700	3		1.3	0.3
Stan	14	3	P	G	4	B	700	8		1.9	0.4	1.8	0.4	7	1
Stan	5	4	P	G	4	A	700	1
Stan	14	4	P	G	4	A	700	2		2.2	0.7
Stan	14	3	P	G	4	B	701	1		5.3	2
Stan	5	4	P	G	4	A	701	1		2.8	1
Stan	14	4	P	G	4	A	701	1		3.2	0.9
Stan	5	1	P	G	4	A	703	2		0.3	0.2
Stan	14	3	P	G	4	A	703	1	139916	1.1	0.5
Stan	14	3	P	G	4	B	703	1		1.1	0.6
Stan	14	3	P	G	4	B	705	1
Stan	14	4	P	G	4	A	705	2		3.6	1.5
Stan	14	4	P	G	4	B	705	1		3.5	1.1
Stan	14	3	P	G	4	A	706	2		1	0.6
Stan	14	3	P	G	4	B	706	3		1.3	0.7
Stan	14	4	P	G	4	A	706	1		0.9	0.6
Stan	14	4	P	G	4	A	707	1		8.2	0.6
Stan	14	4	P	G	4	A	708	1		2.8	0.7
Stan	5	4	P	G	4	A	712	1		5.3	2
Stan	14	3	P	G	4	B	713	1		6.9	1.5
Stan	5	1	P	G	4	B	714	2		5.2	1.9
Stan	5	1	P	G	4	A	715	3		3.5	1.5	3.1	1.2
Stan	14	3	P	G	4	A	718	1
Stan	14	3	P	G	4	B	718	1
Stan	14	4	P	G	4	A	718	1		3.8	0.8
Stan	14	4	P	G	4	B	718	2		2.7	0.5	2.9	0.7
Stan	14	4	P	G	4	A	719	1		2.7	0.3
Stan	14	3	P	G	4	A	720	2		4.4	3.7	2.6	1.2
Stan	5	4	P	G	4	B	720	1		6.4	4.8
Stan	14	4	P	G	4	B	720	1		3.3	2.3
Stan	5	4	P	G	4	A	725	1	139821	3	0.9
Stan	5	4	P	G	4	A	726	1	139824	0.8	0.4
Stan	14	3	P	G	4	B	732	6	140018	1	0.3
Stan	14	3	P	G	4	B	741	1	140017	2	0.9
[truncated: 344 more rows]

## Sheet: ArthropodMetadata
Grassland arthropods are controlled by direct and indirect interactions with cattle and are largely unaffected by plant provenance
Kelly A. Farrell, W. Stanley Harpole, Claudia Stein, Katharine N. Suding, Elizabeth T. Borer
Arthropods collected by vacuum sampling in 1m2 plots in May 2009 (see manuscript for experimental design and sampling details)
Arthropods held by E.T. Borer, University of Minnesota
Column	Description
Experiment	Shorthand name of experiment (useful if data is combined with that of other experiments)
Field	One of two experimental fields (field 5, field 14), each with multiple treatment replicates
Plot	Each Field had 8 experimental plots, two each of four vegetation treatments, for a total of 16 plots in the experiment. They are identified by number here (numbers repeated between fields).
Grass	Vegetation treatment for the plot: P for native Perennial mixture; A for non-native Annual mixture; M for non-native Medusae-head monocolutre (not used in current analysis); the C (non-manipulated Control) plots were not sampled here
Graze	U for Ungrazed; G for Grazed (sampled from the most intense grazing treatment)
Subplot	The mirror-replicate experimental design (see methods) resulted in 2 sub-plots of each grazing treatment within each vegetation plot; here, subplots 1 & 12 (ungrazed), 4 & 7 (heavily grazed) were sampled.
Replicate	Two arthropod samples were taken from each subplot to account for within-plot variation. They were combined and treated as a single sample in analysis.
ID	Arthropod morphotype ID
count	number of a given athropod morphotype in a sample
Pinned	was a specimen pinned as a voucher? If yes, may hold "yes" or may indicate an ascension number associated with Oregon State Arthropod Collection.
Length 1	If one of that morphotype in that sample was measured, length in mm
Width 1	If one of that morphotype in that sample was measured, width in mm
Length 2	If a second individual was measured, length in mm
Width 2	If a second individual was measured, width in mm
Length 3	3rd measured individual ,in mm
Width 3	3rd measured individual, in mm
Length 4	4th measured individual, in mm
Width 4	4th measured individual, in mm
Length 5	5th measured individual, in mm
Width 5	5th measured individual, in mm
Length 6	6th measured individual, in mm
Width 6	6th measured individual, in mm
Length 7	7th measured individual, in mm
Width 7	7th measured individual, in mm
Length 8	8th measured individual, in mm
Width 8	8th measured individual, in mm
Length 9	9th measured individual, in mm
Width 9	9th measured individual, in mm
Notes	notes about arthropod ID

## Sheet: PlantData
PlotID	Field	Plot	Subplot	biomass_g	litter_g	RDM	no_spec	shan_div	sim_div	shan_even	sim_even
1411A12U	14	11	12	172.64	77.76	216.32	15	1.4642	0.6731	0.5407	0.2039
1411A1U	14	11	1	149.28	120.64	92.48	13	1.0781	0.4699	0.4203	0.1451
1411A4G	14	11	4	164.64	81.28	153.76	15	1.5116	0.6053	0.5582	0.1689
1411A7G	14	11	7	111.04	28.96	57.92	14	1.3873	0.5547	0.5257	0.1604
1412P12U	14	12	12	678.72	122.56	444.48	18	1.8747	0.7923	0.6486	0.2675
1412P1U	14	12	1	191.84	43.04	212	16	1.8263	0.7838	0.6587	0.2891
1412P4G	14	12	4	334.88	81.44	91.2	22	2.2004	0.8217	0.7119	0.2549
1412P7G	14	12	7	252.96	193.92	116	17	2.1913	0.8571	0.7734	0.4116
1413P12U	14	13	12	232.64	113.92	152	23	1.9142	0.7627	0.6105	0.1832
1413P1U	14	13	1	141.28	76.96	126.4	15	1.8161	0.7643	0.6706	0.2828
1413P4G	14	13	4	116.16	29.92	123.36	14	2.0122	0.8218	0.7625	0.4008
1413P7G	14	13	7	173.92	25.44	81.6	19	2.004	0.7878	0.6806	0.248
1416A12U	14	16	12	267.2	95.2	234.08	15	1.3172	0.6082	0.4864	0.1702
1416A1U	14	16	1	253.76	138.08	402.88	7	0.3401	0.1262	0.1748	0.1635
1416A4G	14	16	4	80.32	18.56	154.88	13	1.4213	0.6843	0.5541	0.2437
1416A7G	14	16	7	248	104.64	184.48	10	1.2649	0.6292	0.5493	0.2697
51P12U	5	1	12	136.96	219.04	350.08	8	1.2811	0.6471	0.6161	0.3542
51P1U	5	1	1	261.44	328	718.24	9	1.7402	0.8035	0.792	0.5655
51P4G	5	1	4	184.16	145.6	44	21	2.1312	0.7798	0.7	0.2163
51P7G	5	1	7	270.4	109.76	66.88	20	1.9338	0.6777	0.6455	0.1551
53A12U	5	3	12	239.04	191.36	266.24	17	0.8053	0.2696	0.2842	0.0805
53A1U	5	3	1	47.68	231.52	178.4	14	2.2041	0.8643	0.8352	0.5264
53A4G	5	3	4	68.16	15.52	80.32	14	1.9297	0.8014	0.7312	0.3597
53A7G	5	3	7	186.72	52.16	44.32	14	1.954	0.7907	0.7404	0.3413
54P12U	5	4	12	246.72	332.96	285.12	12	1.6446	0.7168	0.6618	0.2943
54P1U	5	4	1	277.12	212.32	987.36	6	1.2209	0.6271	0.6814	0.447
54P4G	5	4	4	90.72	190.24	101.6	15	2.1103	0.815	0.7793	0.3604
54P7G	5	4	7	65.28	191.84	168.48	13	1.806	0.7767	0.7041	0.3445
56A12U	5	6	12	170.72	127.52	479.36	12	0.7995	0.3232	0.3217	0.1231
56A1U	5	6	1	490.4	273.76	408.64	11	1.3837	0.6017	0.577	0.2282
56A4G	5	6	4	283.04	121.12	28	15	2.1619	0.8343	0.7983	0.4023
56A7G	5	6	7	193.12	65.6	233.92	13	1.5581	0.7133	0.6075	0.2683
											21
											26
											31
											1
											38
											26
											31

## Sheet: PlantExplanation
all data per squaremeter
species cover in %
PlotID	Field(5 or 14); Plot; Vegetation Treatment (A=Annual, P=Perennial, M=Medusae-head, C=Control); Subplot; Grazing Treatment (U=Ungrazed, G=Grazed)
biomass_g	harvested in May 2009
litter_g	harvested in May 2009						data are g/m2
RDM	Residual dry matter harvested in September 2009
no_spec	number of species
shan_div	Shannon-Wiener[H]
sim_div	Simpson Diversity[1-D]
shan_even	Shannon-Evenness[EH]
sim_even	Simpson-Evenness [E1/D]
